# Supplementary material for: The SERL Observatory Dataset: Longitudinal Smart Meter Electricity and Gas Data, Survey, EPC and Climate Data for Over 13,000 GB Households
Source: Preprints.org preprint supplement (doi:10.20944/preprints202109.0370.v1), 2021-09-22
Supplement: Supplementary file 2 [file supplementary]

Archive with 10 entries (10 files):
- readme_serl_supplementary_files.pdf
- serl_climate_documentation_edition03.pdf
- serl_epc_documentation_edition03.pdf
- serl_main_recruitment_survey_copy.pdf
- serl_participant_summary_documentation_edition03.pdf
- serl_pilot_recruitment_survey_copy.pdf
- serl_smart_meter_data_quality_report_edition03.pdf
- serl_smart_meter_documentation_edition03.pdf
- serl_survey_documentation_edition03.pdf
- serl_survey_response_frequencies_edition03.csv
