# Supplementary material for: The SERL Observatory Dataset: Longitudinal Smart Meter Electricity and Gas Data, Survey, EPC and Climate Data for Over 13,000 GB Households
Source: Preprints.org preprint supplement (doi:10.20944/preprints202109.0370.v1), 2021-09-22
Supplement: Supplementary file 2 [file supplementary › serl_epc_documentation_edition03.pdf]

# EPC data:

## Technical documentation

|               |                                  |
|---------------|----------------------------------|
| Creation date | 2021-09-01                       |
| Edition       | 03                               |
| Author        | Ellen Webborn, Jessica Few       |
| Project       | Smart Energy Research Lab (SERL) |
| Organisation  | University College London (UCL)  |

### Introduction

This document describes the England and Wales Energy Performance Certificate (EPC) data collected for SERL participants, stored in the file *serl\_epc\_data\_edition03.csv*. The data contains 80 columns and 6921 rows (one row per participant with available EPC data). This document lists the EPC variables available along with basic information about the values for each variable such as number of unique values and statistics for numerical variables. A guide to the variables is available [here](#).

Data were collected with the Domestic Energy Performance Certificates API using the house number and postcode (details [here](#)). Where more than one EPC is registered for an address the most recent is provided.

The data have not been modified from the original source except for the removal of address data (replaced with our PUPRN (a unique identifier) used in the other datasets). Note that data quality analysis has not been performed for this dataset.

### Data summary

Table 1 lists all variables currently available in the SERL EPC dataset. The number of unique values is given, alongside the R data class and an example value from the dataset.

For variables with fewer than 10 unique values in the EPC dataset, Table 2 shows the number of records with each value and the percent with this value (or non-value in the case of N/A or 'NO DATA!' etc.). We also include PUPRN to show the number of records.

Table 1: All EPC variables, the number of unique values found for each variable, the variable (R) class, and an example from the dataset. In some cases examples are invented (for statistical disclosure control) as the count for unique reads is very low; in these instances examples take the same format as the real data.

| <i>variable</i>            | <i>n unique values</i> | <i>class</i> | <i>example</i>  |
|----------------------------|------------------------|--------------|-----------------|
| PUPRN                      | 6,921                  | character    | 1ABC2DE3        |
| currentEnergyRating        | 7                      | character    | D               |
| potentialEnergyRating      | 7                      | character    | D               |
| currentEnergyEfficiency    | 93                     | integer      | 60              |
| potentialEnergyEfficiency  | 99                     | integer      | 84              |
| propertyType               | 5                      | character    | House           |
| builtForm                  | 7                      | character    | Semi-Detached   |
| inspectionDate             | 3,012                  | character    | 13/05/2008      |
| localAuthority             | 339                    | character    | E07000139       |
| constituency               | 572                    | character    | E14001013       |
| lodgementDate              | 3,174                  | character    | 28/01/2014      |
| transactionType            | 17                     | character    | rental (social) |
| environmentImpactCurrent   | 97                     | integer      | 45              |
| environmentImpactPotential | 95                     | integer      | 80              |
| energyConsumptionCurrent   | 586                    | integer      | 234             |
| energyConsumptionPotential | 500                    | numeric      | 77              |
| co2EmissionsCurrent        | 132                    | numeric      | 4.2             |
| co2EmissCurrPerFloorArea   | 351                    | numeric      | 37              |
| co2EmissionsPotential      | 129                    | numeric      | 0.9             |
| lightingCostCurrent        | 234                    | numeric      | 88              |
| lightingCostPotential      | 156                    | numeric      | 33              |
| heatingCostCurrent         | 1,587                  | numeric      | 295             |
| heatingCostPotential       | 1,209                  | numeric      | 356             |
| hotWaterCostCurrent        | 414                    | numeric      | 72              |
| hotWaterCostPotential      | 262                    | numeric      | 57              |
| totalFloorArea             | 1,702                  | numeric      | 80.00           |
| energyTariff               | 9                      | character    | Single          |
| mainsGasFlag               | 3                      | character    | Y               |
| floorLevel                 | 25                     | character    | Ground          |
| flatTopStorey              | 3                      | character    | Y               |
| flatStoreyCount            | 14                     | integer      | 2               |
| mainHeatingControls        | 47                     | integer      | 2107            |

| <i>variable</i>         | <i>n unique values</i> | <i>class</i> | <i>example</i>                                 |
|-------------------------|------------------------|--------------|------------------------------------------------|
| multiGlazeProportion    | 83                     | numeric      | 100                                            |
| glazedType              | 11                     | character    | double glazing, unknown install date           |
| glazedArea              | 7                      | character    | Much More Than Typical                         |
| extensionCount          | 6                      | numeric      | 1                                              |
| numberHabitableRooms    | 16                     | numeric      | 4                                              |
| numberHeatedRooms       | 17                     | numeric      | 5                                              |
| lowEnergyLighting       | 100                    | integer      | 67                                             |
| numberOpenFireplaces    | 9                      | integer      | 0                                              |
| hotwaterDescription     | 38                     | character    | From main system                               |
| hotWaterEnergyEff       | 6                      | character    | Good                                           |
| hotWaterEnvEff          | 6                      | character    | Good                                           |
| floorDescription        | 93                     | character    | Suspended, no insulation (assumed)             |
| floorEnergyEff          | 6                      | character    | Very Good                                      |
| floorEnvEff             | 5                      | character    | Good                                           |
| windowsDescription      | 23                     | character    | Fully double glazed                            |
| windowsEnergyEff        | 6                      | character    | Average                                        |
| windowsEnvEff           | 6                      | character    | Poor                                           |
| wallsDescription        | 126                    | character    | Cavity wall, as built, no insulation (assumed) |
| wallsEnergyEff          | 6                      | character    | Very Good                                      |
| wallsEnvEff             | 6                      | character    | Good                                           |
| secondheatDescription   | 19                     | character    | None                                           |
| sheatingEnergyEff       | 1                      | character    | N/A                                            |
| sheatingEnvEff          | 1                      | character    | N/A                                            |
| roofDescription         | 119                    | character    | Pitched, no insulation                         |
| roofEnergyEff           | 6                      | character    | Good                                           |
| roofEnvEff              | 6                      | character    | N/A                                            |
| mainheatDescription     | 51                     | character    | Boiler and radiators, mains gas                |
| mainheatEnergyEff       | 6                      | character    | Good                                           |
| mainheatEnvEff          | 6                      | character    | Good                                           |
| mainheatcontDescription | 44                     | character    | Programmer, room thermostat and TRVs           |
| mainheatcEnergyEff      | 6                      | character    | Good                                           |

| <i>variable</i>           | <i>n unique values</i> | <i>class</i> | <i>example</i>                           |
|---------------------------|------------------------|--------------|------------------------------------------|
| mainheatcEnvEff           | 6                      | character    | Average                                  |
| lightingDescription       | 111                    | character    | Low energy lighting in all fixed outlets |
| lightingEnergyEff         | 7                      | character    | Good                                     |
| lightingEnvEff            | 6                      | character    | Good                                     |
| mainFuel                  | 31                     | character    | oil (not community)                      |
| windTurbineCount          | 4                      | numeric      | 0                                        |
| heatLossCorridor          | 5                      | character    | unheated corridor                        |
| unheatedCorridorLength    | 368                    | numeric      | 5.189                                    |
| floorHeight               | 170                    | numeric      | 2.40                                     |
| photoSupply               | 16                     | numeric      | 0                                        |
| solarWaterHeatingFlag     | 3                      | character    | N                                        |
| mechanicalVentilation     | 5                      | character    | natural                                  |
| constructionAgeBand       | 15                     | character    | England and Wales: 1991-1995             |
| lodgementDatetime         | 6,887                  | character    | 02/10/2010 14:51                         |
| tenure                    | 10                     | character    | owner-occupied                           |
| fixedLightingOutletsCount | 59                     | numeric      | 15                                       |
| lowEnergyFixedLightCount  | 45                     | numeric      | 4                                        |

Table 2: The number and percent of each value found in the dataset for each variable with fewer than 10 unique values found. Note that number is rounded down to the nearest 10 for statistical disclosure control, and percent is the rounded number as a percent of total (so may not sum to 100%).

| <i>variable</i>       | <i>value</i> | <i>number (rounded)</i> | <i>percent</i> |
|-----------------------|--------------|-------------------------|----------------|
| currentEnergyRating   | A            | 0                       | 0.0            |
|                       | B            | 440                     | 6.4            |
|                       | C            | 2,040                   | 29.5           |
|                       | D            | 3,050                   | 44.1           |
|                       | E            | 1,130                   | 16.3           |
|                       | F            | 180                     | 2.6            |
|                       | G            | 50                      | 0.7            |
| potentialEnergyRating | A            | 180                     | 2.6            |
|                       | B            | 3,310                   | 47.8           |
|                       | C            | 2,670                   | 38.6           |

| <i>variable</i> | <i>value</i>         | <i>number (rounded)</i> | <i>percent</i> |
|-----------------|----------------------|-------------------------|----------------|
|                 | D                    | 580                     | 8.4            |
|                 | E                    | 130                     | 1.9            |
|                 | F                    | 20                      | 0.3            |
|                 | G                    | 0                       | 0.0            |
| propertyType    | Bungalow             | 850                     | 12.3           |
|                 | Flat                 | 1,230                   | 17.8           |
|                 | House                | 4,690                   | 67.8           |
|                 | Maisonette           | 120                     | 1.7            |
|                 | Park home            | 0                       | 0.0            |
| builtForm       | Detached             | 1,840                   | 26.6           |
|                 | Enclosed End-Terrace | 80                      | 1.2            |
|                 | Enclosed Mid-Terrace | 50                      | 0.7            |
|                 | End-Terrace          | 850                     | 12.3           |
|                 | Mid-Terrace          | 1,720                   | 24.9           |
|                 | NO DATA!             | 110                     | 1.6            |
|                 | Semi-Detached        | 2,250                   | 32.5           |
| energyTariff    | INVALID!             | 0                       | 0.0            |
|                 | NO DATA!             | 0                       | 0.0            |
|                 | Single               | 5,170                   | 74.7           |
|                 | Unknown              | 590                     | 8.5            |
|                 | dual                 | 630                     | 9.1            |
|                 | dual (24 hour)       | 0                       | 0.0            |
|                 | off-peak 10 hour     | 10                      | 0.1            |
|                 | off-peak 7 hour      | 100                     | 1.4            |
|                 | standard tariff      | 380                     | 5.5            |
| mainsGasFlag    |                      | 400                     | 5.8            |
|                 | N                    | 730                     | 10.5           |
|                 | Y                    | 5,770                   | 83.4           |
| flatTopStorey   |                      | 5,690                   | 82.2           |
|                 | N                    | 760                     | 11.0           |
|                 | Y                    | 460                     | 6.6            |
| glazedArea      |                      | 0                       | 0.0            |
|                 | Less Than Typical    | 10                      | 0.1            |

| <i>variable</i>      | <i>value</i>           | <i>number (rounded)</i> | <i>percent</i> |
|----------------------|------------------------|-------------------------|----------------|
|                      | More Than Typical      | 180                     | 2.6            |
|                      | Much Less Than Typical | 0                       | 0.0            |
|                      | Much More Than Typical | 40                      | 0.6            |
|                      | NO DATA!               | 400                     | 5.8            |
|                      | Normal                 | 6,270                   | 90.6           |
| extensionCount       |                        | 400                     | 5.8            |
|                      | 0                      | 3,970                   | 57.4           |
|                      | 1                      | 1,850                   | 26.7           |
|                      | 2                      | 540                     | 7.8            |
|                      | 3                      | 110                     | 1.6            |
|                      | 4                      | 30                      | 0.4            |
|                      |                        |                         |                |
| numberOpenFireplaces |                        | 170                     | 2.5            |
|                      | 0                      | 5,880                   | 85.0           |
|                      | 1                      | 670                     | 9.7            |
|                      | 2                      | 140                     | 2.0            |
|                      | 3                      | 20                      | 0.3            |
|                      | 4                      | 10                      | 0.1            |
|                      | 5                      | 0                       | 0.0            |
|                      | 6                      | 0                       | 0.0            |
|                      | 7                      | 0                       | 0.0            |
| hotWaterEnergyEff    | Average                | 950                     | 13.7           |
|                      | Good                   | 4,730                   | 68.3           |
|                      | N/A                    | 20                      | 0.3            |
|                      | Poor                   | 410                     | 5.9            |
|                      | Very Good              | 460                     | 6.6            |
|                      | Very Poor              | 320                     | 4.6            |
|                      |                        |                         |                |
| hotWaterEnvEff       | Average                | 770                     | 11.1           |
|                      | Good                   | 4,880                   | 70.5           |
|                      | N/A                    | 20                      | 0.3            |
|                      | Poor                   | 570                     | 8.2            |
|                      | Very Good              | 440                     | 6.4            |
|                      | Very Poor              | 220                     | 3.2            |
|                      |                        |                         |                |
| floorEnergyEff       | Average                | 0                       | 0.0            |

| <i>variable</i>  | <i>value</i> | <i>number (rounded)</i> | <i>percent</i> |
|------------------|--------------|-------------------------|----------------|
|                  | Good         | 60                      | 0.9            |
|                  | N/A          | 3,540                   | 51.1           |
|                  | NO DATA!     | 3,090                   | 44.6           |
|                  | Poor         | 0                       | 0.0            |
|                  | Very Good    | 210                     | 3.0            |
| floorEnvEff      | Average      | 0                       | 0.0            |
|                  | Good         | 60                      | 0.9            |
|                  | N/A          | 6,630                   | 95.8           |
|                  | Poor         | 0                       | 0.0            |
|                  | Very Good    | 210                     | 3.0            |
| windowsEnergyEff | Average      | 3,840                   | 55.5           |
|                  | Good         | 2,120                   | 30.6           |
|                  | N/A          | 10                      | 0.1            |
|                  | Poor         | 320                     | 4.6            |
|                  | Very Good    | 260                     | 3.8            |
|                  | Very Poor    | 340                     | 4.9            |
| windowsEnvEff    | Average      | 3,840                   | 55.5           |
|                  | Good         | 2,120                   | 30.6           |
|                  | N/A          | 10                      | 0.1            |
|                  | Poor         | 320                     | 4.6            |
|                  | Very Good    | 260                     | 3.8            |
|                  | Very Poor    | 340                     | 4.9            |
| wallsEnergyEff   | Average      | 580                     | 8.4            |
|                  | Good         | 3,170                   | 45.8           |
|                  | N/A          | 10                      | 0.1            |
|                  | Poor         | 1,120                   | 16.2           |
|                  | Very Good    | 330                     | 4.8            |
|                  | Very Poor    | 1,690                   | 24.4           |
| wallsEnvEff      | Average      | 580                     | 8.4            |
|                  | Good         | 3,170                   | 45.8           |
|                  | N/A          | 10                      | 0.1            |
|                  | Poor         | 1,120                   | 16.2           |
|                  | Very Good    | 330                     | 4.8            |

| <i>variable</i>    | <i>value</i> | <i>number (rounded)</i> | <i>percent</i> |
|--------------------|--------------|-------------------------|----------------|
|                    | Very Poor    | 1,690                   | 24.4           |
| sheatingEnergyEff  | N/A          | 6,920                   | 100.0          |
| sheatingEnvEff     | N/A          | 6,920                   | 100.0          |
| roofEnergyEff      | Average      | 1,220                   | 17.6           |
|                    | Good         | 2,880                   | 41.6           |
|                    | N/A          | 840                     | 12.1           |
|                    | Poor         | 340                     | 4.9            |
|                    | Very Good    | 700                     | 10.1           |
|                    | Very Poor    | 910                     | 13.1           |
| roofEnvEff         | Average      | 1,220                   | 17.6           |
|                    | Good         | 2,880                   | 41.6           |
|                    | N/A          | 840                     | 12.1           |
|                    | Poor         | 340                     | 4.9            |
|                    | Very Good    | 700                     | 10.1           |
|                    | Very Poor    | 910                     | 13.1           |
| mainheatEnergyEff  | Average      | 570                     | 8.2            |
|                    | Good         | 5,610                   | 81.1           |
|                    | N/A          | 20                      | 0.3            |
|                    | Poor         | 150                     | 2.2            |
|                    | Very Good    | 350                     | 5.1            |
|                    | Very Poor    | 200                     | 2.9            |
| mainheatEnvEff     | Average      | 300                     | 4.3            |
|                    | Good         | 5,680                   | 82.1           |
|                    | N/A          | 20                      | 0.3            |
|                    | Poor         | 160                     | 2.3            |
|                    | Very Good    | 430                     | 6.2            |
|                    | Very Poor    | 310                     | 4.5            |
| mainheatcEnergyEff | Average      | 2,210                   | 31.9           |
|                    | Good         | 3,630                   | 52.4           |
|                    | N/A          | 20                      | 0.3            |
|                    | Poor         | 460                     | 6.6            |
|                    | Very Good    | 200                     | 2.9            |
|                    | Very Poor    | 390                     | 5.6            |

| <i>variable</i>       | <i>value</i>      | <i>number (rounded)</i> | <i>percent</i> |
|-----------------------|-------------------|-------------------------|----------------|
| mainheatcEnvEff       | Average           | 2,210                   | 31.9           |
|                       | Good              | 3,630                   | 52.4           |
|                       | N/A               | 20                      | 0.3            |
|                       | Poor              | 460                     | 6.6            |
|                       | Very Good         | 200                     | 2.9            |
|                       | Very Poor         | 390                     | 5.6            |
| lightingEnergyEff     |                   | 0                       | 0.0            |
|                       | Average           | 1,180                   | 17.0           |
|                       | Good              | 1,390                   | 20.1           |
|                       | N/A               | 10                      | 0.1            |
|                       | Poor              | 720                     | 10.4           |
|                       | Very Good         | 2,560                   | 37.0           |
|                       | Very Poor         | 1,050                   | 15.2           |
| lightingEnvEff        | Average           | 1,180                   | 17.0           |
|                       | Good              | 1,390                   | 20.1           |
|                       | N/A               | 10                      | 0.1            |
|                       | Poor              | 720                     | 10.4           |
|                       | Very Good         | 2,560                   | 37.0           |
|                       | Very Poor         | 1,050                   | 15.2           |
| windTurbineCount      |                   | 220                     | 3.2            |
|                       | -1                | 0                       | 0.0            |
|                       | 0                 | 6,680                   | 96.5           |
|                       | 1                 | 0                       | 0.0            |
| heatLossCorridor      |                   | 4,500                   | 65.0           |
|                       | NO DATA!          | 2,020                   | 29.2           |
|                       | heated corridor   | 60                      | 0.9            |
|                       | no corridor       | 140                     | 2.0            |
|                       | unheated corridor | 180                     | 2.6            |
| solarWaterHeatingFlag |                   | 2,610                   | 37.7           |
|                       | N                 | 4,270                   | 61.7           |
|                       | Y                 | 30                      | 0.4            |
| mechanicalVentilation |                   | 0                       | 0.0            |
|                       | NO DATA!          | 400                     | 5.8            |

| <i>variable</i> | <i>value</i>                   | <i>number (rounded)</i> | <i>percent</i> |
|-----------------|--------------------------------|-------------------------|----------------|
|                 | mechanical, extract only       | 30                      | 0.4            |
|                 | mechanical, supply and extract | 10                      | 0.1            |
|                 | natural                        | 6,470                   | 93.5           |
