# Supplementary material for: The SERL Observatory Dataset: Longitudinal Smart Meter Electricity and Gas Data, Survey, EPC and Climate Data for Over 13,000 GB Households
Source: Preprints.org preprint supplement (doi:10.20944/preprints202109.0370.v1), 2021-09-22
Supplement: Supplementary file 2 [file supplementary › serl_participant_summary_documentation_edition03.pdf]

# Participant information:

## Technical Documentation

|               |                                  |
|---------------|----------------------------------|
| Creation date | 2021-08-23                       |
| Edition       | 03                               |
| Author        | Ellen Webborn, Jessica Few       |
| Project       | Smart Energy Research Lab (SERL) |
| Organisation  | University College London (UCL)  |

### Introduction

This document describes the participant summary file available to researchers with secure access to the SERL Observatory datasets. This file gives basic information for each participant as well as a summary of the smart meter data quality.

The filename of this dataset is: *serl\_participant\_summary\_edition{number}.csv*, where *{number}* is the number of the data release, *e.g.* "02" (note that the first data release files are labelled with the release date rather than edition number).

The file has one row per participant and there are 13321 rows in the latest data table. There are 38 columns, such as the region and LSOA of the participant, how many survey questions they answered, information about the start and end dates of each schedule and the number and percentage of reads that were valid for each schedule. Details of all columns in this data table are provided below. Note that we no longer provide column detailing the number of invalid read times for each participant.

The read-related column names take the form "text\_W\_X\_Y\_Z" for electricity readings and "text\_W\_X\_Z" for gas readings. Rather than explaining every single column, here is key to the variable component of the name:

- W = device type (either electricity meter ("ESME") or Gas Proxy Function i.e. gas meter ("GPF"))
- X = whether the read is half-hourly ("HH") or daily ("D")
- Y = active ("Act") or reactive ("React") power (electricity reads only)
- Z = import ("Im") or export ("Ex")

For example "NumValid\_ESME\_D\_Act\_IM" is the number of valid daily electricity active import readings. The text in the first part of the name is described in the table below.

Table 1:

| <i>Field (or field name format)</i> | <i>Description</i>                                                                                                      | <i>Units</i> | <i>Class</i> | <i>Example value</i> |
|-------------------------------------|-------------------------------------------------------------------------------------------------------------------------|--------------|--------------|----------------------|
| PUPRN                               | Pseudonymised participant identifier                                                                                    | NA           | character    | 1VUXXXF1             |
| Region                              | Region in GB                                                                                                            | NA           | character    | East Midlands        |
| LSOA                                | Lower Super Output Area in GB                                                                                           | NA           | character    | E01015916            |
| grid_cell                           | Grid cell for linking to climate data                                                                                   | NA           | character    | 38_31                |
| IMD_quintile                        | Index of Multiple Deprivation quintile (1 is most deprived, 5 is least deprived)                                        | NA           | integer      | 2                    |
| EPC_exists                          | TRUE if a record exists in the EPC dataset for the participant                                                          | NA           | logical      | TRUE                 |
| EPC_rating                          | EPC rating (original column name 'current_energy_rating') - a letter between A and G inclusive                          | NA           | character    | C                    |
| pilot_test_cell                     | Test cell (1 to 12) assigned to participants for the pilot study (testing recruitment approaches)                       | NA           | integer      | 12                   |
| N_survey_ans                        | Number of questions answered in the survey (30 relevant to all, a further 9 may be relevant depending on other answers) | NA           | integer      | 35                   |

| <i>Field (or field name format)</i> | <i>Description</i>                                                                                                                                                           | <i>Units</i> | <i>Class</i> | <i>Example value</i> |
|-------------------------------------|------------------------------------------------------------------------------------------------------------------------------------------------------------------------------|--------------|--------------|----------------------|
| Perc_survey_ans                     | % of relevant questions answered in the survey (may be greater than 100% if question relevance was not possible to determine or if question skipping was not done correctly) | NA           | numeric      | 98.1203              |
| Start_W_X_Y_Z                       | First valid read date for data type W_X_Y_Z                                                                                                                                  | %Y-%m-%d     | Date         | 2019-11-01           |
| End_W_X_Y_Z                         | Last valid read date for data type W_X_Y_Z                                                                                                                                   | %Y-%m-%d     | Date         | 2020-02-29           |
| NumValid_W_X_Y_Z                    | Number of valid reads (error code 1) for data type W_X_Y_Z                                                                                                                   | NA           | integer      | 98                   |
| PercValid_W_X_Y_Z                   | Percentage of possible reads (using theoretical start and end dates rather than actual valid read start and end dates) that are valid (error code 1) for data type W_X_Y_Z   | NA           | numeric      | 95.2                 |
