# Supplementary material for: The SERL Observatory Dataset: Longitudinal Smart Meter Electricity and Gas Data, Survey, EPC and Climate Data for Over 13,000 GB Households
Source: Preprints.org preprint supplement (doi:10.20944/preprints202109.0370.v1), 2021-09-22
Supplement: Supplementary file 2 [file supplementary › serl_survey_documentation_edition03.pdf]

# Survey data: Technical documentation

|               |                                  |
|---------------|----------------------------------|
| Creation date | 2021-08-18                       |
| Edition       | 03                               |
| Author        | Ellen Webborn, Jessica Few       |
| Project       | Smart Energy Research Lab (SERL) |
| Organisation  | University College London (UCL)  |

## Table of Contents

|                                 |   |
|---------------------------------|---|
| Introduction .....              | 1 |
| Data collection .....           | 2 |
| Wave 1 .....                    | 2 |
| Wave 2 .....                    | 2 |
| Wave 3 .....                    | 2 |
| Survey data summary table ..... | 3 |

## Introduction

This document describes the survey responses data table. This table includes the original survey responses data in addition to several columns that describe, summarise or attempt to clean some of the responses. Files currently available relating to the survey data are:

- *serl\_survey\_data\_edition03.csv*: the survey data collected during the SERL recruitment wave 1 (pilot study, September 2019) and wave 2 (September 2019)
- *serl\_survey\_data\_dictionary\_edition03.csv*: A table matching the variables and response codes to the survey questions and responses
- *serl\_pilot\_recruitment\_survey\_copy.pdf*: the postal survey sent to households in the first (pilot) recruitment wave

- *serl\_main\_recruitment\_survey\_copy.pdf*: the postal survey sent to households in the main recruitment waves (very similar to the survey used in the pilot study, see details below).

This document is structured as follows. First we describe the data collection process. The next section details the survey response columns and the meaning of the values they can take, the final section describes the remaining data fields.

## Data collection

### Wave 1

The SERL pilot study recruited the first wave of participants during September and October 2019. 18,000 households in central and southern England and in Wales were sent up to 4 letters inviting them to participate in SERL, of which approximately 1700 signed up. All mailings encouraged sign-up online, and some of the mailings provided a paper consent form and survey to sign up by post. The consent form giving access to their smart meter data was mandatory for participation. Completion of the survey was encouraged but not required.

### Wave 2

Wave 2 recruitment took place in September 2019, recruiting approximately 3200 additional participants. Households were sent up to 3 mailings, the first two offering online sign-up only and the third offering postal and online sign-up. Completion of the survey was encouraged but not required. The survey was almost identical to the wave 1 survey, with the exception of question A5 which offered more response options. In wave 1 we found that some people were clearly reporting their preferred thermostat temperature in Fahrenheit and so two boxes were provided for wave 2 participants giving an option of either degrees C or degrees F.

### Wave 3

Wave 3 recruitment took place in January 2021, recruiting approximately 8000 additional participants. As for wave 2, households were sent up to 3 mailings, the first two offering online sign-up only and the third offering postal and online sign-up. The language used by Welsh participants who completed the postal survey was not recorded for this wave, so the language is reported as 'unknown'. Completion of the survey was encouraged but not required. The survey was identical to the wave 2 survey. The survey data from edition 3 onward contains an additional column, A5\_err, which flags likely errors in the responses to question A5.

The survey dataset contains 12977 rows (one per participant who started the survey) and 153 columns. The data has been processed to allow for as much comparability between survey versions and completion methods (online or postal) as possible. Since online respondents were forced to skip questions automatically based on their responses, this was imposed in the data cleaning process on postal participants if they did not skip as instructed (see survey questions for skipping logic).

## Survey data summary table

Table 1 has the following columns:

- *Survey field*: variable name (e.g. 'Region') or question number. In some cases the questions come in multiple parts, in which case they have names such as "A13\_01" and "A13\_02" or "A1501" and "A1502". Some questions allowed for multiple options to be selected, in which case each option has its own column in the table with possible answers yes (selected) and no (not selected). For example question A3 has ten options, with columns named A301 - A310. There is also a box for participants to write free text. In this case that option is called "A3\_Other".
- *Approximate question*: The corresponding survey question (sometimes with approximate wording for brevity). See the electronic copy of the paper survey for the exact question wording and options.
- *Possible values*: the pre-defined values that code different response options (where the responses are pre-defined). If free text is available then this may be "NA" (such as for A3\_Other) or the free text response may not be listed (such as for A5 which asks for the temperature households set their thermostat to).
- *Value meanings*: the response option in the survey corresponding to each value code.
- *Variable Type*: the type of variable: *primary* (asked in the survey), *derived* (derived from the data, such as an error code or sum of responses), and *inherited* (information inherited from other sources, such as the participant id or the survey version supplied).

Note that the variables ending '\_new' are the 'corrected' variables following basic/obvious error correction (e.g. tally notation used, or ages of occupants given rather than the number in each age/sex category). In the case of D1 - D3 the 'new' variables included filling these responses for the single-occupant households from their earlier data (since the household data represents the survey completer).

Code used for processing will be made available shortly on the SERL github repository [github.com/smartEnergyResearchLab](https://github.com/smartEnergyResearchLab).

Table 1: Guide to the survey data: variables and response codes.

| <i>Survey field</i> | <i>Approximate question</i>          | <i>Possible values</i> | <i>Value meanings</i> | <i>Variable Type</i> |
|---------------------|--------------------------------------|------------------------|-----------------------|----------------------|
| PUPRN               | Pseudonymised participant identifier |                        |                       | Assigned             |
| Survey_version      | Version of the survey received       | Wave1                  | Wave 1 (pilot)        | Assigned             |
|                     |                                      | Wave2                  | Wave 2                | Assigned             |
|                     |                                      | Wave3                  | Wave 3                | Assigned             |

| <i>Survey field</i> | <i>Approximate question</i>                                                                 | <i>Possible values</i> | <i>Value meanings</i> | <i>Variable Type</i> |
|---------------------|---------------------------------------------------------------------------------------------|------------------------|-----------------------|----------------------|
| Recorded_date       | Date survey was recorded by participants (if online) or entered online from postal response |                        |                       | Assigned             |
| Collection_method   | Data collection method                                                                      | Online                 | Online                | Primary              |
|                     |                                                                                             | Postal                 | Offline               | Primary              |
| Language            | Please select your language preference                                                      | English                | English               | Primary              |
|                     |                                                                                             | Welsh                  | Welsh                 | Primary              |
|                     |                                                                                             | Unknown                | Unknown               | Primary              |
| A1                  | Before we contacted you about this study, did you know you had a smart meter?               | -2                     | No answer             | Primary              |
|                     |                                                                                             | 1                      | Yes                   | Primary              |
|                     |                                                                                             | 2                      | No                    | Primary              |
| A2                  | Having a smart meter has affected the way you use gas or electricity?                       | -9                     | Not applicable        | Primary              |
|                     |                                                                                             | -2                     | No answer             | Primary              |
|                     |                                                                                             | -1                     | Don't know            | Primary              |
|                     |                                                                                             | 1                      | A lot                 | Primary              |
|                     |                                                                                             | 2                      | Some                  | Primary              |
|                     |                                                                                             | 3                      | A little              | Primary              |
|                     |                                                                                             | 4                      | Not at all            | Primary              |
| A301                | Type of central heating - None                                                              | 0                      | No                    | Primary              |
|                     |                                                                                             | 1                      | Yes                   | Primary              |
| A302                | Type of central heating - gas, gas boiler                                                   | 0                      | No                    | Primary              |
|                     |                                                                                             | 1                      | Yes                   | Primary              |
| A303                | Type of central heating - electric storage heaters                                          | 0                      | No                    | Primary              |
|                     |                                                                                             | 1                      | Yes                   | Primary              |
| A304                | Type of central heating - electric radiators                                                | 0                      | No                    | Primary              |
|                     |                                                                                             | 1                      | Yes                   | Primary              |

| <i>Survey field</i> | <i>Approximate question</i>                                          | <i>Possible values</i> | <i>Value meanings</i>                            | <i>Variable Type</i> |
|---------------------|----------------------------------------------------------------------|------------------------|--------------------------------------------------|----------------------|
| A305                | Type of central heating - other electric                             | 0                      | No                                               | Primary              |
|                     |                                                                      | 1                      | Yes                                              | Primary              |
| A306                | Type of central heating - oil                                        | 0                      | No                                               | Primary              |
|                     |                                                                      | 1                      | Yes                                              | Primary              |
| A307                | Type of central heating - solid fuel                                 | 0                      | No                                               | Primary              |
|                     |                                                                      | 1                      | Yes                                              | Primary              |
| A308                | Type of central heating - biomass                                    | 0                      | No                                               | Primary              |
|                     |                                                                      | 1                      | Yes                                              | Primary              |
| A309                | Type of central heating - district or community                      | 0                      | No                                               | Primary              |
|                     |                                                                      | 1                      | Yes                                              | Primary              |
| A310                | Type of central heating - other                                      | 0                      | No                                               | Primary              |
|                     |                                                                      | 1                      | Yes                                              | Primary              |
| A3_Other            |                                                                      |                        |                                                  | Primary              |
| A3_sum              | Number of response options selected for A3 (A301 + A302 + .. + A310) |                        |                                                  | Derived              |
| A3_err              | Clear error in A3 response                                           | TRUE                   | 'No central heating' and another option selected | Derived              |
|                     |                                                                      | FALSE                  | Otherwise                                        | Derived              |
| A301_edit           | Has A301 been edited                                                 | TRUE                   | A301 was edited from 1 to 0 since A3_err         | Derived              |
|                     |                                                                      | FALSE                  | No edits to A301                                 | Derived              |
| A401                | Central Heating controls - timer                                     | -9                     | Not applicable                                   | Primary              |
|                     |                                                                      | 0                      | No                                               | Primary              |
|                     |                                                                      | 1                      | Yes                                              | Primary              |
| A402                |                                                                      | -9                     | Not applicable                                   | Primary              |
|                     |                                                                      | 0                      | No                                               | Primary              |

| <i>Survey field</i> | <i>Approximate question</i>                                          | <i>Possible values</i> | <i>Value meanings</i>                       | <i>Variable Type</i> |
|---------------------|----------------------------------------------------------------------|------------------------|---------------------------------------------|----------------------|
|                     | Central Heating controls - temperature setting                       | 1                      | Yes                                         | Primary              |
| A403                | Central Heating controls - smart device                              | -9                     | Not applicable                              | Primary              |
|                     |                                                                      | 0                      | No                                          | Primary              |
|                     |                                                                      | 1                      | Yes                                         | Primary              |
| A404                | Central Heating controls - manually                                  | -9                     | Not applicable                              | Primary              |
|                     |                                                                      | 0                      | No                                          | Primary              |
|                     |                                                                      | 1                      | Yes                                         | Primary              |
| A405                | Central Heating controls - none of the above                         | -9                     | Not applicable                              | Primary              |
|                     |                                                                      | 0                      | No                                          | Primary              |
|                     |                                                                      | 1                      | Yes                                         | Primary              |
| A406                | Central Heating controls - don't know                                | -9                     | Not applicable                              | Primary              |
|                     |                                                                      | 0                      | No                                          | Primary              |
|                     |                                                                      | 1                      | Yes                                         | Primary              |
| A4_sum              | Number of response options selected for A4 (A401 + A402 + .. + A406) |                        |                                             | Derived              |
| A4_err              | Clear error in A4 response                                           | TRUE                   | 'None of these' and another option selected | Derived              |
|                     |                                                                      | FALSE                  | Otherwise                                   | Derived              |
| A405_edit           | Has A405 been edited                                                 | TRUE                   | A405 was edited from 1 to 0 since A4_err    | Derived              |
|                     |                                                                      | FALSE                  | No edits to A405                            | Derived              |
| A5                  | Temperature controller set at for late afternoons or evenings        | -9                     | Not applicable                              | Primary              |
|                     |                                                                      | -2                     | No answer                                   | Primary              |
|                     |                                                                      | -1                     | Don't know/doesn't apply                    | Primary              |
|                     |                                                                      | 1                      | Answer in deg C                             | Primary              |

| <i>Survey field</i>    | <i>Approximate question</i>                                                              | <i>Possible values</i> | <i>Value meanings</i>                                                                                                         | <i>Variable Type</i> |
|------------------------|------------------------------------------------------------------------------------------|------------------------|-------------------------------------------------------------------------------------------------------------------------------|----------------------|
| A5_C_text<br>A5_F_text |                                                                                          | 2                      | Answer in deg F                                                                                                               | Primary              |
|                        |                                                                                          | 3                      | Answer in deg C and deg F                                                                                                     | Primary              |
|                        |                                                                                          |                        | Degrees C                                                                                                                     | Primary              |
|                        |                                                                                          |                        | Degrees F                                                                                                                     | Primary              |
| A5_degC                | Temperature in deg C, converted from deg F if > 35, or if given in deg F (later surveys) |                        |                                                                                                                               | Derived              |
| A5_edit                | Has A5 been edited                                                                       | TRUE                   | A5 was edited due to non-integer response or wrong units                                                                      | Derived              |
|                        |                                                                                          | FALSE                  | No edits to A5                                                                                                                | Derived              |
| A5_err                 | Clear error in A4 response                                                               | TRUE                   | <10 deg C or >35 deg C (after conversion from deg F if applicable), or if deg F and deg C answers differ by more than 1 deg C | Derived              |
|                        |                                                                                          | FALSE                  | Otherwise                                                                                                                     | Derived              |
| A6                     | Does your household use any standalone heaters                                           | -2                     | No answer                                                                                                                     | Primary              |
|                        |                                                                                          | 1                      | No                                                                                                                            | Primary              |
|                        |                                                                                          | 2                      | Yes                                                                                                                           | Primary              |
| A7                     | Do any of your standalone heaters have their own source of power                         | -9                     | Not applicable                                                                                                                | Primary              |
|                        |                                                                                          | -2                     | No answer                                                                                                                     | Primary              |
|                        |                                                                                          | 1                      | Yes, some or all have their own source of fuel (e.g. logs, coal, bottled gas, etc.)                                           | Primary              |
|                        |                                                                                          | 2                      | No, all are powered by mains gas or electric                                                                                  | Primary              |
|                        |                                                                                          |                        |                                                                                                                               |                      |
| A8                     |                                                                                          | -9                     | Not applicable                                                                                                                | Primary              |

| <i>Survey field</i> | <i>Approximate question</i>                                                        | <i>Possible values</i> | <i>Value meanings</i>                            | <i>Variable Type</i> |
|---------------------|------------------------------------------------------------------------------------|------------------------|--------------------------------------------------|----------------------|
|                     | In very cold winter weather, how often are these standalone heaters typically used | -2                     | No answer                                        | Primary              |
|                     |                                                                                    | -1                     | Don't know                                       | Primary              |
|                     |                                                                                    | 1                      | Daily                                            | Primary              |
|                     |                                                                                    | 2                      | Most days                                        | Primary              |
|                     |                                                                                    | 3                      | Rarely - only if I/we really have to             | Primary              |
|                     |                                                                                    | 4                      | Never                                            | Primary              |
|                     |                                                                                    | 5                      | Varies - depends on temperature or other reasons | Primary              |
| A901                | Do you adjust your heating - When especially cold                                  | 0                      | No                                               | Primary              |
|                     |                                                                                    | 1                      | Yes                                              | Primary              |
| A902                | Do you adjust your heating - Because of children, infants, babies                  | 0                      | No                                               | Primary              |
|                     |                                                                                    | 1                      | Yes                                              | Primary              |
| A903                | Do you adjust your heating - Visitors                                              | 0                      | No                                               | Primary              |
|                     |                                                                                    | 1                      | Yes                                              | Primary              |
| A904                | Do you adjust your heating - Pets                                                  | 0                      | No                                               | Primary              |
|                     |                                                                                    | 1                      | Yes                                              | Primary              |
| A905                | Do you adjust your heating - Stress                                                | 0                      | No                                               | Primary              |
|                     |                                                                                    | 1                      | Yes                                              | Primary              |
| A906                | Do you adjust your heating - Working at home                                       | 0                      | No                                               | Primary              |
|                     |                                                                                    | 1                      | Yes                                              | Primary              |
| A907                | Do you adjust your heating - None of these                                         | 0                      | No                                               | Primary              |
|                     |                                                                                    | 1                      | Yes                                              | Primary              |
| A9_sum              | Number of response options selected for A9 (A901 + A902 + .. + A907)               |                        |                                                  | Derived              |
| A10                 |                                                                                    | -2                     | No answer                                        | Primary              |

| <i>Survey field</i> | <i>Approximate question</i>                                    | <i>Possible values</i> | <i>Value meanings</i>          | <i>Variable Type</i> |
|---------------------|----------------------------------------------------------------|------------------------|--------------------------------|----------------------|
|                     | How do you adjust heating controls when house is unoccupied    | 1                      | Always                         | Primary              |
|                     |                                                                | 2                      | Very often                     | Primary              |
|                     |                                                                | 3                      | Quite often                    | Primary              |
|                     |                                                                | 4                      | Not very often                 | Primary              |
|                     |                                                                | 5                      | Never                          | Primary              |
|                     |                                                                | 6                      | Not applicable, cannot do this | Primary              |
| A11                 | During the winter, are there living spaces not normally heated | -2                     | No answer                      | Primary              |
|                     |                                                                | 1                      | Yes                            | Primary              |
|                     |                                                                | 2                      | No                             | Primary              |
| A12_Taps_GB         | Tap water heated (Gas Boiler)                                  | 0                      | No                             | Primary              |
|                     |                                                                | 1                      | Yes                            | Primary              |
| A12_Taps_EH         | Tap water heated (Electrical Heater)                           | 0                      | No                             | Primary              |
|                     |                                                                | 1                      | Yes                            | Primary              |
| A12_Taps_SWH        | Tap water heated (Solar Water Heater)                          | 0                      | No                             | Primary              |
|                     |                                                                | 1                      | Yes                            | Primary              |
| A12_Taps_Other      | Tap water heated (Other)                                       | 0                      | No                             | Primary              |
|                     |                                                                | 1                      | Yes                            | Primary              |
| A12_Taps_NA         | Tap water heated (Not applicable)                              | 0                      | No                             | Primary              |
|                     |                                                                | 1                      | Yes                            | Primary              |
| A12_Taps_DK         | Tap water heated (Dont Know)                                   | 0                      | No                             | Primary              |
|                     |                                                                | 1                      | Yes                            | Primary              |
| A12_Taps_sum        | Number of response options selected for A12 (taps)             |                        |                                | Derived              |
| A12_Shower_GB       | Shower water heated (Gas Boiler)                               | 0                      | No                             | Primary              |
|                     |                                                                | 1                      | Yes                            | Primary              |
| A12_Shower_EH       |                                                                | 0                      | No                             | Primary              |

| <i>Survey field</i> | <i>Approximate question</i>                          | <i>Possible values</i> | <i>Value meanings</i>          | <i>Variable Type</i> |
|---------------------|------------------------------------------------------|------------------------|--------------------------------|----------------------|
|                     | Shower water heated (Electrical Heater)              | 1                      | Yes                            | Primary              |
| A12_Shower_SWH      | Shower water heated (Solar Water Heater)             | 0                      | No                             | Primary              |
|                     |                                                      | 1                      | Yes                            | Primary              |
| A12_Shower_Other    | Shower water heated (Other)                          | 0                      | No                             | Primary              |
|                     |                                                      | 1                      | Yes                            | Primary              |
| A12_Shower_NA       | Shower water heated (Not applicable)                 | 0                      | No                             | Primary              |
|                     |                                                      | 1                      | Yes                            | Primary              |
| A12_Shower_DK       | Shower water heated (Dont Know)                      | 0                      | No                             | Primary              |
|                     |                                                      | 1                      | Yes                            | Primary              |
| A12_Shower_sum      | Number of response options selected for A12 (shower) |                        |                                | Derived              |
| A13_01              | How often do you .. Switch off lights                | -2                     | No answer                      | Primary              |
|                     |                                                      | 1                      | Always                         | Primary              |
|                     |                                                      | 2                      | Very often                     | Primary              |
|                     |                                                      | 3                      | Quite often                    | Primary              |
|                     |                                                      | 4                      | Not very often                 | Primary              |
|                     |                                                      | 5                      | Never                          | Primary              |
|                     |                                                      | 6                      | Not applicable, cannot do this | Primary              |
| A13_02              | How often do you .. Put on more clothes when cold    | -2                     | No answer                      | Primary              |
|                     |                                                      | 1                      | Always                         | Primary              |
|                     |                                                      | 2                      | Very often                     | Primary              |
|                     |                                                      | 3                      | Quite often                    | Primary              |
|                     |                                                      | 4                      | Not very often                 | Primary              |
|                     |                                                      | 5                      | Never                          | Primary              |
|                     |                                                      | 6                      | Not applicable, cannot do this | Primary              |

| <i>Survey field</i> | <i>Approximate question</i>                                             | <i>Possible values</i> | <i>Value meanings</i>  | <i>Variable Type</i> |
|---------------------|-------------------------------------------------------------------------|------------------------|------------------------|----------------------|
| A14                 | How much effort do you say your household makes to limit energy usage   | -2                     | No answer              | Primary              |
|                     |                                                                         | -1                     | Don't know             | Primary              |
|                     |                                                                         | 1                      | A great deal of effort | Primary              |
|                     |                                                                         | 2                      | Some effort            | Primary              |
|                     |                                                                         | 3                      | A little effort        | Primary              |
|                     |                                                                         | 4                      | No effort at all       | Primary              |
| A1501               | How often will your household open the windows .. on a typical cold day | -2                     | No answer              | Primary              |
|                     |                                                                         | -1                     | Don't know             | Primary              |
|                     |                                                                         | 1                      | Always                 | Primary              |
|                     |                                                                         | 2                      | Very often             | Primary              |
|                     |                                                                         | 3                      | Quite often            | Primary              |
|                     |                                                                         | 4                      | Not very often         | Primary              |
| A1502               | How often will your household open the windows .. on a typical warm day | 5                      | Never                  | Primary              |
|                     |                                                                         | -2                     | No answer              | Primary              |
|                     |                                                                         | -1                     | Don't know             | Primary              |
|                     |                                                                         | 1                      | Always                 | Primary              |
|                     |                                                                         | 2                      | Very often             | Primary              |
|                     |                                                                         | 3                      | Quite often            | Primary              |
| A1601               | Considering replacing or adding heating or energy- Not considering      | 4                      | Not very often         | Primary              |
|                     |                                                                         | 5                      | Never                  | Primary              |
|                     |                                                                         | 0                      | No                     | Primary              |
| A1602               | Considering replacing or adding heating or energy- Not applicable       | 1                      | Yes                    | Primary              |
|                     |                                                                         | 0                      | No                     | Primary              |
| A1603               |                                                                         | 0                      | No                     | Primary              |

| <i>Survey field</i> | <i>Approximate question</i>                                                     | <i>Possible values</i> | <i>Value meanings</i> | <i>Variable Type</i> |
|---------------------|---------------------------------------------------------------------------------|------------------------|-----------------------|----------------------|
|                     | Considering replacing or adding heating or energy- Gas Boiler                   | 1                      | Yes                   | Primary              |
| A1604               | Considering replacing or adding heating or energy- Solar panels for electricity | 0                      | No                    | Primary              |
|                     |                                                                                 | 1                      | Yes                   | Primary              |
| A1605               | Considering replacing or adding heating or energy- Solar water heating          | 0                      | No                    | Primary              |
|                     |                                                                                 | 1                      | Yes                   | Primary              |
| A1606               | Considering replacing or adding heating or energy- Wood or fuel burner          | 0                      | No                    | Primary              |
|                     |                                                                                 | 1                      | Yes                   | Primary              |
| A1607               | Considering replacing or adding heating or energy- Heat pump                    | 0                      | No                    | Primary              |
|                     |                                                                                 | 1                      | Yes                   | Primary              |
| A1608               | Considering replacing or adding heating or energy- Micro combined HPU           | 0                      | No                    | Primary              |
|                     |                                                                                 | 1                      | Yes                   | Primary              |
| A1609               | Considering replacing or adding heating or energy- Wind turbine                 | 0                      | No                    | Primary              |
|                     |                                                                                 | 1                      | Yes                   | Primary              |
| A1610               | Considering replacing or adding heating or energy- other specify                | 0                      | No                    | Primary              |
|                     |                                                                                 | 1                      | Yes                   | Primary              |
| A16_Other           | Considering replacing or adding heating or energy- other                        |                        |                       | Primary              |
| A16_sum             | Number of response options selected for A16 (A1601 + A1602 + .. + A1610)        |                        |                       | Derived              |

| <i>Survey field</i> | <i>Approximate question</i>                 | <i>Possible values</i> | <i>Value meanings</i>                                                                                                             | <i>Variable Type</i> |
|---------------------|---------------------------------------------|------------------------|-----------------------------------------------------------------------------------------------------------------------------------|----------------------|
| A16_edit            | Has A16 been edited                         | TRUE                   | A1603 to A1609 were edited from 1 to 0 if 'not applicable' or 'not considering any changes' were also selected (excludes 'other') | Derived              |
|                     |                                             | FALSE                  | No edits to A16                                                                                                                   | Derived              |
| B1                  | What type of accommodation do you live in   | -2                     | No answer                                                                                                                         | Primary              |
|                     |                                             | 1                      | detached                                                                                                                          | Primary              |
|                     |                                             | 2                      | semi detached                                                                                                                     | Primary              |
|                     |                                             | 3                      | terraced (including end terrace)                                                                                                  | Primary              |
|                     |                                             | 4                      | in a purpose-built block of flats or tenement                                                                                     | Primary              |
|                     |                                             | 5                      | part of a converted or shared house (including bedsits)                                                                           | Primary              |
|                     |                                             | 6                      | in a commercial building (e.g. in an office building, hotel or over a shop)                                                       | Primary              |
| B2                  | Is your accommodation self contained        | -2                     | No answer                                                                                                                         | Primary              |
|                     |                                             | 1                      | Yes, all the rooms are behind a door that only my household can use                                                               | Primary              |
|                     |                                             | 2                      | No                                                                                                                                | Primary              |
| B3                  | How many other households do you share with | -9                     | Not applicable                                                                                                                    | Primary              |
|                     |                                             | -2                     | No answer                                                                                                                         | Primary              |
| B4                  | Do you own or rent this accommodation       | -2                     | No answer                                                                                                                         | Primary              |
|                     |                                             | 1                      | Own it outright / buying it with a mortgage/loan                                                                                  | Primary              |
|                     |                                             | 2                      | Part own and part rent (shared ownership)                                                                                         | Primary              |

| <i>Survey field</i> | <i>Approximate question</i>                                  | <i>Possible values</i> | <i>Value meanings</i>                                     | <i>Variable Type</i> |
|---------------------|--------------------------------------------------------------|------------------------|-----------------------------------------------------------|----------------------|
|                     |                                                              | 3                      | Privately                                                 | Primary              |
|                     |                                                              | 4                      | From council (local authority) or housing association     | Primary              |
|                     |                                                              | 5                      | Live here rent free                                       | Primary              |
| B5                  | How many rooms are available for use by this household       | -2                     | No answer                                                 | Primary              |
|                     |                                                              | -4                     | Unusable                                                  | Primary              |
| B5_err              | Clear error in B5 response                                   | TRUE                   | B5 < B6 (fewer rooms than bedrooms) or B5 == 0 (no rooms) | Derived              |
|                     |                                                              | FALSE                  | B5 >= B6 and B5 != 0                                      | Derived              |
| B6                  | How many of these rooms count as bedrooms                    | -2                     | No answer                                                 | Primary              |
|                     |                                                              | -4                     | Unusable                                                  | Primary              |
| B6_err              | Clear error in B6 response                                   | TRUE                   | B5 < B6 (fewer rooms than bedrooms)                       | Derived              |
|                     |                                                              | FALSE                  | B5 >= B6                                                  | Derived              |
| B7                  | During the cold winter weather can you keep comfortably warm | -2                     | No answer                                                 | Primary              |
|                     |                                                              | -1                     | Don't know                                                | Primary              |
|                     |                                                              | 1                      | Yes                                                       | Primary              |
|                     |                                                              | 2                      | No                                                        | Primary              |
| B8                  | Do you have problems with condensation, damp or mould        | -2                     | No answer                                                 | Primary              |
|                     |                                                              | -1                     | Don't know                                                | Primary              |
|                     |                                                              | 1                      | Yes                                                       | Primary              |
|                     |                                                              | 2                      | No                                                        | Primary              |
| B9                  | When was your accommodation built                            | -2                     | No answer                                                 | Primary              |
|                     |                                                              | -1                     | Don't know                                                | Primary              |
|                     |                                                              | 1                      | Before 1900                                               | Primary              |
|                     |                                                              | 2                      | 1900 to 1929                                              | Primary              |
|                     |                                                              | 3                      | 1930 to 1949                                              | Primary              |

| <i>Survey field</i> | <i>Approximate question</i>                                           | <i>Possible values</i> | <i>Value meanings</i> | <i>Variable Type</i> |
|---------------------|-----------------------------------------------------------------------|------------------------|-----------------------|----------------------|
|                     |                                                                       | 4                      | 1950 to 1975          | Primary              |
|                     |                                                                       | 5                      | 1976 to 1990          | Primary              |
|                     |                                                                       | 6                      | 1991 to 2002          | Primary              |
|                     |                                                                       | 7                      | 2003 onwards          | Primary              |
| B1001               | Appliances in accommodation - Kitchen - Electric Oven                 | 0                      | No                    | Primary              |
|                     |                                                                       | 1                      | Yes                   | Primary              |
| B1002               | Appliances in accommodation - Kitchen - Gas Oven                      | 0                      | No                    | Primary              |
|                     |                                                                       | 1                      | Yes                   | Primary              |
| B1003               | Appliances in accommodation - Kitchen - Electric Hob                  | 0                      | No                    | Primary              |
|                     |                                                                       | 1                      | Yes                   | Primary              |
| B1004               | Appliances in accommodation - Kitchen - Gas Hob                       | 0                      | No                    | Primary              |
|                     |                                                                       | 1                      | Yes                   | Primary              |
| B1005               | Appliances in accommodation - Kitchen - Dishwasher                    | 0                      | No                    | Primary              |
|                     |                                                                       | 1                      | Yes                   | Primary              |
| B1006               | Appliances in accommodation - Kitchen - Fridge or fridge-freezer      | 0                      | No                    | Primary              |
|                     |                                                                       | 1                      | Yes                   | Primary              |
| B1007               | Appliances in accommodation - Kitchen - Separate stand alone freezer  | 0                      | No                    | Primary              |
|                     |                                                                       | 1                      | Yes                   | Primary              |
| B1008               | Appliances in accommodation - Laundry - Combined clothes washer dryer | 0                      | No                    | Primary              |
|                     |                                                                       | 1                      | Yes                   | Primary              |
| B1009               | Appliances in accommodation - Laundry - Washing machine               | 0                      | No                    | Primary              |
|                     |                                                                       | 1                      | Yes                   | Primary              |
| B1010               |                                                                       | 0                      | No                    | Primary              |

| <i>Survey field</i> | <i>Approximate question</i>                                              | <i>Possible values</i> | <i>Value meanings</i> | <i>Variable Type</i> |
|---------------------|--------------------------------------------------------------------------|------------------------|-----------------------|----------------------|
|                     | Appliances in accommodation - Laundry - Tumble dryer                     | 1                      | Yes                   | Primary              |
| B1011               | Appliances in accommodation - Consumer electronics - Laptop, computer    | 0                      | No                    | Primary              |
|                     |                                                                          | 1                      | Yes                   | Primary              |
| B1012               | Appliances in accommodation - Consumer electronics - TV                  | 0                      | No                    | Primary              |
|                     |                                                                          | 1                      | Yes                   | Primary              |
| B1013               | Appliances in accommodation - Cooling - air conditioning unit            | 0                      | No                    | Primary              |
|                     |                                                                          | 1                      | Yes                   | Primary              |
| B1014               | Appliances in accommodation - Cooling - cooling fan                      | 0                      | No                    | Primary              |
|                     |                                                                          | 1                      | Yes                   | Primary              |
| B10_sum             | Number of response options selected for B10 (B1001 + B1002 + .. + B1014) |                        |                       | Derived              |
| C1                  | How many people live in household                                        | -2                     | No answer             | Primary              |
| C1_new              | Number of occupants after error correction                               |                        |                       | Derived              |
| C2_Male_0_15        | Males in household (0-15)                                                | -2                     | No answer             | Primary              |
| C2_Male_16_24       | Males in household (16-24)                                               | -2                     | No answer             | Primary              |
| C2_Male_25_44       | Males in household (25-44)                                               | -2                     | No answer             | Primary              |
| C2_Male_45_64       | Males in household (45-64)                                               | -2                     | No answer             | Primary              |
| C2_Male_65_74       | Males in household (65-74)                                               | -2                     | No answer             | Primary              |

| <i>Survey field</i> | <i>Approximate question</i>           | <i>Possible values</i> | <i>Value meanings</i>                          | <i>Variable Type</i> |
|---------------------|---------------------------------------|------------------------|------------------------------------------------|----------------------|
| C2_Male_75_84       | Males in houshold (75-84)             | -2                     | No answer                                      | Primary              |
| C2_Male_85_plus     | Males in houshold (85+)               | -2                     | No answer                                      | Primary              |
| C2_Female_0_15      | Females in houshold (0-15)            | -2                     | No answer                                      | Primary              |
| C2_Female_16_24     | Females in houshold (16-24)           | -2                     | No answer                                      | Primary              |
| C2_Female_25_44     | Females in houshold (25-44)           | -2                     | No answer                                      | Primary              |
| C2_Female_45_64     | Females in houshold (45-64)           | -2                     | No answer                                      | Primary              |
| C2_Female_65_74     | Females in houshold (65-74)           | -2                     | No answer                                      | Primary              |
| C2_Female_75_84     | Females in houshold (75-84)           | -2                     | No answer                                      | Primary              |
| C2_Female_85_plus   | Females in houshold (85+)             | -2                     | No answer                                      | Primary              |
| C2_sum              | Number of occupants from C2 responses |                        |                                                | Derived              |
| C2_sum_diff         | C2_sum - C1_new                       |                        |                                                | Derived              |
| C2_error            | Clear error in C2 response            | TRUE                   | C2_sum_dif != 0 after obvious error correction | Derived              |
|                     |                                       | FALSE                  | C2_sum_diff == 0                               | Derived              |
| C2_tot_child        | Number of occupants aged under 16     |                        |                                                | Derived              |
| C2_tot_adult        | Number of occupants aged 16+          |                        |                                                | Derived              |
| C2_tot_65_plus      | Number of occupants aged 65+          |                        |                                                | Derived              |
| C2_all_65_plus      | All occupants aged 65+                | 1                      | All aged 65+                                   | Derived              |
|                     |                                       | 0                      | Not all aged 65+                               | Derived              |

| <i>Survey field</i> | <i>Approximate question</i>                                          | <i>Possible values</i> | <i>Value meanings</i>                                        | <i>Variable Type</i> |
|---------------------|----------------------------------------------------------------------|------------------------|--------------------------------------------------------------|----------------------|
| C301                | Working Status - Working 30 + hours per week                         | -2                     | No answer                                                    | Primary              |
| C302                | Working Status - Working less than 30 hours per week                 | -2                     | No answer                                                    | Primary              |
| C303                | Working Status - Not Working - long term sickness or disability      | -2                     | No answer                                                    | Primary              |
| C304                | Working Status - Unemployed but seeking work                         | -2                     | No answer                                                    | Primary              |
| C305                | Working Status - Student                                             | -2                     | No answer                                                    | Primary              |
| C306                | Working Status - Retired / at home / not seeking work                | -2                     | No answer                                                    | Primary              |
| C307                | Working Status - Other                                               | -2                     | No answer                                                    | Primary              |
| C3_sum              | Number of response options selected for C3 (C307 + C302 + .. + C307) |                        |                                                              | Derived              |
| C3_sum_diff         | C3_sum - C2_tot_adult                                                |                        |                                                              | Derived              |
| C3_error            | Clear error in C3 response given adults reported                     | TRUE                   | C3_sum_diff != 0 and C2_tot_adult calculatable, or C3_sum>15 | Derived              |
|                     |                                                                      | FALSE                  | Otherwise                                                    | Derived              |
| C3_edit             | Has C3 been edited                                                   | TRUE                   | C3_sum_diff == 0 and C3 and C2 both answered                 | Derived              |
|                     |                                                                      | FALSE                  | Otherwise                                                    | Derived              |
| None_working        | No adults work                                                       | 1                      | No adults working                                            | Derived              |
|                     |                                                                      | 0                      | Some adults working                                          | Derived              |

| <i>Survey field</i> | <i>Approximate question</i>                                        | <i>Possible values</i> | <i>Value meanings</i>                                                                    | <i>Variable Type</i> |
|---------------------|--------------------------------------------------------------------|------------------------|------------------------------------------------------------------------------------------|----------------------|
|                     |                                                                    | NA                     | Not possible to determine                                                                | Derived              |
| C4                  | How many people in household hold a degree or higher qualification | -2                     | No answer                                                                                | Primary              |
|                     |                                                                    | -1                     | Don't know/prefer not to say                                                             | Primary              |
|                     |                                                                    |                        | Non-numeric answer given                                                                 | Primary              |
| C4_error            | Clear error in C4 response given occupants reported                | TRUE                   | C4 > C1_new and C1 answered (more qualified than occupants), or non-numeric answer given | Derived              |
|                     |                                                                    | FALSE                  | Otherwise                                                                                | Derived              |
| C5                  | Does household have plug in electric vehicle                       | -2                     | No answer                                                                                | Primary              |
|                     |                                                                    | -1                     | Don't know                                                                               | Primary              |
|                     |                                                                    | 1                      | Yes                                                                                      | Primary              |
|                     |                                                                    | 2                      | No                                                                                       | Primary              |
| C6                  | When does household charge electric vehicle at home                | -9                     | Not applicable                                                                           | Primary              |
|                     |                                                                    | -2                     | No answer                                                                                | Primary              |
|                     |                                                                    | -1                     | Don't know                                                                               | Primary              |
|                     |                                                                    | 1                      | Mostly overnight (8pm to 7am)                                                            | Primary              |
|                     |                                                                    | 2                      | Mostly during the day (7am to 4pm)                                                       | Primary              |
|                     |                                                                    | 3                      | Mostly in the evening (4pm to 8pm)                                                       | Primary              |
|                     |                                                                    | 4                      | Varies - whenever it's needed                                                            | Primary              |
|                     |                                                                    | 5                      | Not applicable, charging is not done at home (e.g. at work)                              | Primary              |
| D1                  | Age Group                                                          | -9                     | Not applicable                                                                           | Primary              |
|                     |                                                                    | -2                     | No answer                                                                                | Primary              |

| <i>Survey field</i> | <i>Approximate question</i>                               | <i>Possible values</i> | <i>Value meanings</i> | <i>Variable Type</i> |
|---------------------|-----------------------------------------------------------|------------------------|-----------------------|----------------------|
|                     |                                                           | 1                      | Under 18              | Primary              |
|                     |                                                           | 2                      | 18-24                 | Primary              |
|                     |                                                           | 3                      | 25-44                 | Primary              |
|                     |                                                           | 4                      | 45-64                 | Primary              |
|                     |                                                           | 5                      | 65-74                 | Primary              |
|                     |                                                           | 6                      | 75-84                 | Primary              |
|                     |                                                           | 7                      | 85+                   | Primary              |
| D1_new              | Individual's age group, filled from C1 if single occupier | -2                     | No answer             | Derived              |
|                     |                                                           | 1                      | Under 18              | Derived              |
|                     |                                                           | 2                      | 18-24                 | Derived              |
|                     |                                                           | 3                      | 25-44                 | Derived              |
|                     |                                                           | 4                      | 45-64                 | Derived              |
|                     |                                                           | 5                      | 65-74                 | Derived              |
|                     |                                                           | 6                      | 75-84                 | Derived              |
| D2                  | Gender                                                    | 7                      | 85+                   | Derived              |
|                     |                                                           | -9                     | Not applicable        | Primary              |
|                     |                                                           | -3                     | Prefer not to say     | Primary              |
|                     |                                                           | -2                     | No answer             | Primary              |
|                     |                                                           | 1                      | Male                  | Primary              |
|                     |                                                           | 2                      | Female                | Primary              |
| D2_new              | Individual's gender, filled from C2 if single occupier    | 3                      | In some other way     | Primary              |
|                     |                                                           | -3                     | Prefer not to say     | Derived              |
|                     |                                                           | -2                     | No answer             | Derived              |
|                     |                                                           | 1                      | Male                  | Derived              |
|                     |                                                           | 2                      | Female                | Derived              |
| D3                  |                                                           | 3                      | In some other way     | Derived              |
|                     |                                                           | -9                     | Not applicable        | Primary              |

| <i>Survey field</i> | <i>Approximate question</i>                                    | <i>Possible values</i> | <i>Value meanings</i>                                                         | <i>Variable Type</i> |
|---------------------|----------------------------------------------------------------|------------------------|-------------------------------------------------------------------------------|----------------------|
|                     | Current Employment Status                                      | -3                     | Prefer not to say                                                             | Primary              |
|                     |                                                                | -2                     | No answer                                                                     | Primary              |
|                     |                                                                | 1                      | Working (paid or unpaid): 30 hours a week or more                             | Primary              |
|                     |                                                                | 2                      | Working (paid or unpaid): less than 30 hours a week                           | Primary              |
|                     |                                                                | 3                      | Not working because of long-term sickness or disability                       | Primary              |
|                     |                                                                | 4                      | Unemployed but seeking work                                                   | Primary              |
|                     |                                                                | 5                      | A student                                                                     | Primary              |
|                     |                                                                | 6                      | Retired/at home/not seeking work (including looking after the home or family) | Primary              |
|                     |                                                                | 7                      | Other                                                                         | Primary              |
| D3_new              | Individual's working status, filled from C3 if single occupier | -3                     | Prefer not to say                                                             | Derived              |
|                     |                                                                | -2                     | No answer                                                                     | Derived              |
|                     |                                                                | 1                      | Working (paid or unpaid): 30 hours a week or more                             | Derived              |
|                     |                                                                | 2                      | Working (paid or unpaid): less than 30 hours a week                           | Derived              |
|                     |                                                                | 3                      | Not working because of long-term sickness or disability                       | Derived              |
|                     |                                                                | 4                      | Unemployed but seeking work                                                   | Derived              |
|                     |                                                                | 5                      | A student                                                                     | Derived              |

| <i>Survey field</i> | <i>Approximate question</i>        | <i>Possible values</i> | <i>Value meanings</i>                                                         | <i>Variable Type</i> |
|---------------------|------------------------------------|------------------------|-------------------------------------------------------------------------------|----------------------|
| D4                  | How well do you manage financially | 6                      | Retired/at home/not seeking work (including looking after the home or family) | Derived              |
|                     |                                    | 7                      | Other                                                                         | Derived              |
|                     |                                    | -3                     | Prefer not to say                                                             | Primary              |
|                     |                                    | -2                     | No answer                                                                     | Primary              |
|                     |                                    | -1                     | Don't know                                                                    | Primary              |
|                     |                                    | 1                      | Living comfortably                                                            | Primary              |
|                     |                                    | 2                      | Doing alright                                                                 | Primary              |
|                     |                                    | 3                      | Just about getting by                                                         | Primary              |
|                     |                                    | 4                      | Finding it quite difficult                                                    | Primary              |
|                     |                                    | 5                      | Finding it very difficult                                                     | Primary              |
