# Supplementary material for: The SERL Observatory Dataset: Longitudinal Smart Meter Electricity and Gas Data, Survey, EPC and Climate Data for Over 13,000 GB Households
Source: Preprints.org preprint supplement (doi:10.20944/preprints202109.0370.v1), 2021-09-22
Supplement: Supplementary file 2 [file supplementary › serl_survey_response_frequencies_edition03.csv]

Variable	Value	ordering	Label	freeText	Type	Freq	Rounding	Percentage
Survey_version	Wave1	2	Wave 1 (pilot)	FALSE	Assigned	1669	1	12.86
Survey_version	Wave2	2	Wave 2	FALSE	Assigned	3065	1	23.62
Survey_version	Wave3	2	Wave 3	FALSE	Assigned	8243	1	63.52
Collection_method	Online	4	Online	FALSE	Primary	8944	1	68.92
Collection_method	Postal	4	Offline	FALSE	Primary	4033	1	31.08
Language	English	5	English	FALSE	Primary	12730	10	98.1
Language	Welsh	5	Welsh	FALSE	Primary	0	10	0
Language	Unknown	5	Unknown	FALSE	Primary	230	10	1.77
A1	-2	6	No answer	FALSE	Primary	140	1	1.08
A1	1	6	Yes	FALSE	Primary	12600	1	97.09
A1	2	6	No	FALSE	Primary	237	1	1.83
A2	-9	7	Not applicable	FALSE	Primary	237	1	1.83
A2	-2	7	No answer	FALSE	Primary	161	1	1.24
A2	-1	7	Don't know	FALSE	Primary	295	1	2.27
A2	1	7	A lot	FALSE	Primary	993	1	7.65
A2	2	7	Some	FALSE	Primary	2225	1	17.15
A2	3	7	A little	FALSE	Primary	3108	1	23.95
A2	4	7	Not at all	FALSE	Primary	5958	1	45.91
A301	0	8	No	FALSE	Primary	12809	1	98.71
A301	1	8	Yes	FALSE	Primary	168	1	1.29
A302	0	9	No	FALSE	Primary	1710	1	13.18
A302	1	9	Yes	FALSE	Primary	11267	1	86.82
A303	0	10	No	FALSE	Primary	12720	1	98.02
A303	1	10	Yes	FALSE	Primary	257	1	1.98
A304	0	11	No	FALSE	Primary	12428	1	95.77
A304	1	11	Yes	FALSE	Primary	549	1	4.23
A305	0	12	No	FALSE	Primary	12760	1	98.33
A305	1	12	Yes	FALSE	Primary	217	1	1.67
A306	0	13	No	FALSE	Primary	12458	1	96
A306	1	13	Yes	FALSE	Primary	519	1	4
A307	0	14	No	FALSE	Primary	12605	1	97.13
A307	1	14	Yes	FALSE	Primary	372	1	2.87
A308	0	15	No	FALSE	Primary	12955	1	99.83
A308	1	15	Yes	FALSE	Primary	22	1	0.17
A309	0	16	No	FALSE	Primary	12836	1	98.91
A309	1	16	Yes	FALSE	Primary	141	1	1.09
A310	0	17	No	FALSE	Primary	12739	1	98.17
A310	1	17	Yes	FALSE	Primary	238	1	1.83
A3_sum	0	19		FALSE	Derived	151	1	1.16
A3_sum	1	19		FALSE	Derived	11981	1	92.32
A3_sum	2	19		FALSE	Derived	759	1	5.85
A3_sum	>2	19		FALSE	Derived	86	1	0.66
A3_err	TRUE	20	'No central heating' and another option selected	FALSE	Derived	13	1	0.1
A3_err	FALSE	20	Otherwise	FALSE	Derived	12964	1	99.9
A301_edit	TRUE	21	A301 was edited from 1 to 0 since A3_err	FALSE	Derived	13	1	0.1
A301_edit	FALSE	21	No edits to A301	FALSE	Derived	12964	1	99.9
A401	-9	22	Not applicable	FALSE	Primary	177	1	1.36
A401	0	22	No	FALSE	Primary	2540	1	19.57
A401	1	22	Yes	FALSE	Primary	10260	1	79.06
A402	-9	23	Not applicable	FALSE	Primary	177	1	1.36
A402	0	23	No	FALSE	Primary	2708	1	20.87
A402	1	23	Yes	FALSE	Primary	10092	1	77.77
A403	-9	24	Not applicable	FALSE	Primary	177	1	1.36
A403	0	24	No	FALSE	Primary	10646	1	82.04
A403	1	24	Yes	FALSE	Primary	2154	1	16.6
A404	-9	25	Not applicable	FALSE	Primary	177	1	1.36
A404	0	25	No	FALSE	Primary	12095	1	93.2
A404	1	25	Yes	FALSE	Primary	705	1	5.43
A405	-9	26	Not applicable	FALSE	Primary	177	1	1.36
A405	0	26	No	FALSE	Primary	12748	1	98.24
A405	1	26	Yes	FALSE	Primary	52	1	0.4
A406	-9	27	Not applicable	FALSE	Primary	177	1	1.36
A406	0	27	No	FALSE	Primary	12730	1	98.1
A406	1	27	Yes	FALSE	Primary	70	1	0.54
A4_sum	-54	28		FALSE	Derived	177	1	1.36
A4_sum	0	28		FALSE	Derived	140	1	1.08
A4_sum	1	28		FALSE	Derived	3485	1	26.86
A4_sum	2	28		FALSE	Derived	7677	1	59.16
A4_sum	>2	28		FALSE	Derived	1498	1	11.54
A4_err	TRUE	29	'None of these' and another option selected	FALSE	Derived	0	50	0
A4_err	FALSE	29	Otherwise	FALSE	Derived	12950	50	99.79
A405_edit	TRUE	30	A405 was edited from 1 to 0 since A4_err	FALSE	Derived	0	50	0
A405_edit	FALSE	30	No edits to A405	FALSE	Derived	12950	50	99.79
A5	-9	31	Not applicable	TRUE	Primary	2198	1	16.94
A5	-2	31	No answer	TRUE	Primary	208	1	1.6
A5	-1	31	Don't know/doesn't apply	TRUE	Primary	778	1	6
A5	1	31	Answer in deg C	TRUE	Primary	9597	1	73.95
A5	2	31	Answer in deg F	TRUE	Primary	173	1	1.33
A5	3	31	Answer in deg C and deg F	TRUE	Primary	23	1	0.18
A5_edit	TRUE	35	A5 was edited due to non-integer response or wrong units	FALSE	Derived	204	1	1.57
A5_edit	FALSE	35	No edits to A5	FALSE	Derived	12773	1	98.43
A5_err	TRUE	36	<10 deg C or >35 deg C (after conversion from deg F if applicable), or if deg F and deg C answers differ by more than 1 deg C	FALSE	Derived	52	1	0.4
A5_err	FALSE	36	Otherwise	FALSE	Derived	12925	1	99.6
A6	-2	37	No answer	FALSE	Primary	237	1	1.83
A6	1	37	No	FALSE	Primary	6411	1	49.4
A6	2	37	Yes	FALSE	Primary	6329	1	48.77
A7	-9	38	Not applicable	FALSE	Primary	6411	1	49.4
A7	-2	38	No answer	FALSE	Primary	199	1	1.53
A7	1	38	Yes, some or all have their own source of fuel (e.g. logs, coal, bottled gas, etc.)	FALSE	Primary	1703	1	13.12
A7	2	38	No, all are powered by mains gas or electric	FALSE	Primary	4664	1	35.94
A8	-9	39	Not applicable	FALSE	Primary	11070	10	85.3
A8	-2	39	No answer	FALSE	Primary	190	10	1.46
A8	-1	39	Don't know	FALSE	Primary	0	10	0
A8	1	39	Daily	FALSE	Primary	390	10	3.01
A8	2	39	Most days	FALSE	Primary	460	10	3.54
A8	3	39	Rarely - only if I/we really have to	FALSE	Primary	320	10	2.47
A8	4	39	Never	FALSE	Primary	20	10	0.15
A8	5	39	Varies - depends on temperature or other reasons	FALSE	Primary	480	10	3.7
A901	0	40	No	FALSE	Primary	2114	1	16.29
A901	1	40	Yes	FALSE	Primary	10863	1	83.71
A902	0	41	No	FALSE	Primary	11496	1	88.59
A902	1	41	Yes	FALSE	Primary	1481	1	11.41
A903	0	42	No	FALSE	Primary	9894	1	76.24
A903	1	42	Yes	FALSE	Primary	3083	1	23.76
A904	0	43	No	FALSE	Primary	12643	1	97.43
A904	1	43	Yes	FALSE	Primary	334	1	2.57
A905	0	44	No	FALSE	Primary	11005	1	84.8
A905	1	44	Yes	FALSE	Primary	1972	1	15.2
A906	0	45	No	FALSE	Primary	8673	1	66.83
A906	1	45	Yes	FALSE	Primary	4304	1	33.17
A907	0	46	No	FALSE	Primary	11792	1	90.87
A907	1	46	Yes	FALSE	Primary	1185	1	9.13
A9_sum	0	47		FALSE	Derived	194	1	1.49
A9_sum	1	47		FALSE	Derived	6209	1	47.85
A9_sum	2	47		FALSE	Derived	3734	1	28.77
A9_sum	3	47		FALSE	Derived	2004	1	15.44
A9_sum	4	47		FALSE	Derived	661	1	5.09
A9_sum	5	47		FALSE	Derived	154	1	1.19
A9_sum	6	47		FALSE	Derived	21	1	0.16
A10	-2	48	No answer	FALSE	Primary	175	1	1.35
A10	1	48	Always	FALSE	Primary	5167	1	39.82
A10	2	48	Very often	FALSE	Primary	1843	1	14.2
A10	3	48	Quite often	FALSE	Primary	1283	1	9.89
A10	4	48	Not very often	FALSE	Primary	1874	1	14.44
A10	5	48	Never	FALSE	Primary	1749	1	13.48
A10	6	48	Not applicable, cannot do this	FALSE	Primary	886	1	6.83
A11	-2	49	No answer	FALSE	Primary	156	1	1.2
A11	1	49	Yes	FALSE	Primary	4398	1	33.89
A11	2	49	No	FALSE	Primary	8423	1	64.91
A12_Taps_GB	0	50	No	FALSE	Primary	11374	1	87.65
A12_Taps_GB	1	50	Yes	FALSE	Primary	1603	1	12.35
A12_Taps_EH	0	51	No	FALSE	Primary	11787	1	90.83
A12_Taps_EH	1	51	Yes	FALSE	Primary	1190	1	9.17
A12_Taps_SWH	0	52	No	FALSE	Primary	12820	1	98.79
A12_Taps_SWH	1	52	Yes	FALSE	Primary	157	1	1.21
A12_Taps_Other	0	53	No	FALSE	Primary	12842	1	98.96
A12_Taps_Other	1	53	Yes	FALSE	Primary	135	1	1.04
A12_Taps_NA	0	54	No	FALSE	Primary	12472	1	96.11
A12_Taps_NA	1	54	Yes	FALSE	Primary	505	1	3.89
A12_Taps_DK	0	55	No	FALSE	Primary	3198	1	24.64
A12_Taps_DK	1	55	Yes	FALSE	Primary	9779	1	75.36
A12_Taps_sum	0	56		FALSE	Derived	212	1	1.63
A12_Taps_sum	1	56		FALSE	Derived	12212	1	94.1
A12_Taps_sum	2	56		FALSE	Derived	514	1	3.96
A12_Taps_sum	>2	56		FALSE	Derived	39	1	0.3
A12_Shower_GB	0	57	No	FALSE	Primary	11731	1	90.4
A12_Shower_GB	1	57	Yes	FALSE	Primary	1246	1	9.6
A12_Shower_EH	0	58	No	FALSE	Primary	9072	1	69.91
A12_Shower_EH	1	58	Yes	FALSE	Primary	3905	1	30.09
A12_Shower_SWH	0	59	No	FALSE	Primary	12823	1	98.81
A12_Shower_SWH	1	59	Yes	FALSE	Primary	154	1	1.19
A12_Shower_Other	0	60	No	FALSE	Primary	12794	1	98.59
A12_Shower_Other	1	60	Yes	FALSE	Primary	183	1	1.41
A12_Shower_NA	0	61	No	FALSE	Primary	12539	1	96.62
A12_Shower_NA	1	61	Yes	FALSE	Primary	438	1	3.38
A12_Shower_DK	0	62	No	FALSE	Primary	5574	1	42.95
A12_Shower_DK	1	62	Yes	FALSE	Primary	7403	1	57.05
A12_Shower_sum	0	63		FALSE	Derived	582	1	4.48
A12_Shower_sum	1	63		FALSE	Derived	11506	1	88.66
A12_Shower_sum	2	63		FALSE	Derived	852	1	6.57
A12_Shower_sum	>2	63		FALSE	Derived	37	1	0.29
A13_01	-2	64	No answer	FALSE	Primary	184	1	1.42
A13_01	1	64	Always	FALSE	Primary	7245	1	55.83
A13_01	2	64	Very often	FALSE	Primary	4125	1	31.79
A13_01	3	64	Quite often	FALSE	Primary	1156	1	8.91
A13_01	4	64	Not very often	FALSE	Primary	229	1	1.76
A13_01	5	64	Never	FALSE	Primary	26	1	0.2
A13_01	6	64	Not applicable, cannot do this	FALSE	Primary	12	1	0.09
A13_02	-2	65	No answer	FALSE	Primary	201	1	1.55
A13_02	1	65	Always	FALSE	Primary	2569	1	19.8
A13_02	2	65	Very often	FALSE	Primary	3918	1	30.19
A13_02	3	65	Quite often	FALSE	Primary	3623	1	27.92
A13_02	4	65	Not very often	FALSE	Primary	2217	1	17.08
A13_02	5	65	Never	FALSE	Primary	417	1	3.21
A13_02	6	65	Not applicable, cannot do this	FALSE	Primary	32	1	0.25
A14	-2	66	No answer	FALSE	Primary	181	1	1.39
A14	-1	66	Don't know	FALSE	Primary	86	1	0.66
A14	1	66	A great deal of effort	FALSE	Primary	2967	1	22.86
A14	2	66	Some effort	FALSE	Primary	6994	1	53.9
A14	3	66	A little effort	FALSE	Primary	2369	1	18.26
A14	4	66	No effort at all	FALSE	Primary	380	1	2.93
A1501	-2	67	No answer	FALSE	Primary	274	1	2.11
A1501	-1	67	Don't know	FALSE	Primary	16	1	0.12
A1501	1	67	Always	FALSE	Primary	743	1	5.73
A1501	2	67	Very often	FALSE	Primary	1013	1	7.81
A1501	3	67	Quite often	FALSE	Primary	2071	1	15.96
A1501	4	67	Not very often	FALSE	Primary	5975	1	46.04
A1501	5	67	Never	FALSE	Primary	2885	1	22.23
A1502	-2	68	No answer	FALSE	Primary	220	10	1.7
A1502	-1	68	Don't know	FALSE	Primary	0	10	0
A1502	1	68	Always	FALSE	Primary	6780	10	52.25
A1502	2	68	Very often	FALSE	Primary	3870	10	29.82
A1502	3	68	Quite often	FALSE	Primary	1420	10	10.94
A1502	4	68	Not very often	FALSE	Primary	550	10	4.24
A1502	5	68	Never	FALSE	Primary	90	10	0.69
A1601	0	69	No	FALSE	Primary	2801	1	21.58
A1601	1	69	Yes	FALSE	Primary	10176	1	78.42
A1602	0	70	No	FALSE	Primary	12051	1	92.86
A1602	1	70	Yes	FALSE	Primary	926	1	7.14
A1603	0	71	No	FALSE	Primary	12320	1	94.94
A1603	1	71	Yes	FALSE	Primary	657	1	5.06
A1604	0	72	No	FALSE	Primary	12550	1	96.71
A1604	1	72	Yes	FALSE	Primary	427	1	3.29
A1605	0	73	No	FALSE	Primary	12804	1	98.67
A1605	1	73	Yes	FALSE	Primary	173	1	1.33
A1606	0	74	No	FALSE	Primary	12807	1	98.69
A1606	1	74	Yes	FALSE	Primary	170	1	1.31
A1607	0	75	No	FALSE	Primary	12800	1	98.64
A1607	1	75	Yes	FALSE	Primary	177	1	1.36
A1608	0	76	No	FALSE	Primary	12943	1	99.74
A1608	1	76	Yes	FALSE	Primary	34	1	0.26
A1609	0	77	No	FALSE	Primary	12941	1	99.72
A1609	1	77	Yes	FALSE	Primary	36	1	0.28
A1610	0	78	No	FALSE	Primary	12486	1	96.22
A1610	1	78	Yes	FALSE	Primary	491	1	3.78
A16_sum	0	80		FALSE	Derived	238	1	1.83
A16_sum	1	80		FALSE	Derived	12361	1	95.25
A16_sum	2	80		FALSE	Derived	276	1	2.13
A16_sum	3	80		FALSE	Derived	69	1	0.53
A16_sum	>3	80		FALSE	Derived	33	1	0.25
A16_edit	TRUE	81	A1603 to A1609 were edited from 1 to 0 if 'not applicable' or 'not considering any changes' were also selected (excludes 'other')	FALSE	Derived	43	1	0.33
A16_edit	FALSE	81	No edits to A16	FALSE	Derived	12934	1	99.67
B1	-2	82	No answer	FALSE	Primary	248	1	1.91
B1	1	82	detached	FALSE	Primary	3660	1	28.2
B1	2	82	semi detached	FALSE	Primary	3870	1	29.82
B1	3	82	terraced (including end terrace)	FALSE	Primary	3141	1	24.2
B1	4	82	in a purpose-built block of flats or tenement	FALSE	Primary	1720	1	13.25
B1	5	82	part of a converted or shared house (including bedsits)	FALSE	Primary	305	1	2.35
B1	6	82	in a commercial building (e.g. in an office building, hotel or over a shop)	FALSE	Primary	33	1	0.25
B2	-2	83	No answer	FALSE	Primary	239	1	1.84
B2	1	83	Yes, all the rooms are behind a door that only my household can use	FALSE	Primary	12579	1	96.93
B2	2	83	No	FALSE	Primary	159	1	1.23
B3	-9	84	Not applicable	TRUE	Primary	12580	1	96.94
B3	-2	84	No answer	TRUE	Primary	243	1	1.87
B3	0	84		TRUE	Primary	80	1	0.62
B3	1	84		TRUE	Primary	24	1	0.18
B3	2	84		TRUE	Primary	15	1	0.12
B3	>2	84		TRUE	Primary	35	1	0.27
B4	-2	85	No answer	FALSE	Primary	222	1	1.71
B4	1	85	Own it outright / buying it with a mortgage/loan	FALSE	Primary	10083	1	77.7
B4	2	85	Part own and part rent (shared ownership)	FALSE	Primary	105	1	0.81
B4	3	85	Privately	FALSE	Primary	1209	1	9.32
B4	4	85	From council (local authority) or housing association	FALSE	Primary	1280	1	9.86
B4	5	85	Live here rent free	FALSE	Primary	78	1	0.6
B5	-4	86	Unusable	TRUE	Primary	52	1	0.4
B5	-2	86	No answer	TRUE	Primary	281	1	2.17
B5	1	86		TRUE	Primary	31	1	0.24
B5	2	86		TRUE	Primary	259	1	2
B5	3	86		TRUE	Primary	994	1	7.66
B5	4	86		TRUE	Primary	2005	1	15.45
B5	5	86		TRUE	Primary	2670	1	20.57
B5	6	86		TRUE	Primary	2525	1	19.46
B5	7	86		TRUE	Primary	1687	1	13
B5	8	86		TRUE	Primary	1184	1	9.12
B5	9	86		TRUE	Primary	669	1	5.16
B5	10	86		TRUE	Primary	342	1	2.64
B5	11	86		TRUE	Primary	137	1	1.06
B5	12	86		TRUE	Primary	73	1	0.56
B5	13	86		TRUE	Primary	23	1	0.18
B5	14	86		TRUE	Primary	11	1	0.08
B5	15	86		TRUE	Primary	10	1	0.08
B5	>15	86		TRUE	Primary	24	1	0.18
B5_err	TRUE	87	B5 < B6 (fewer rooms than bedrooms) or B5 == 0 (no rooms)	FALSE	Derived	53	1	0.41
B5_err	FALSE	87	B5 >= B6 and B5 != 0	FALSE	Derived	12924	1	99.59
B6	-4	88	Unusable	TRUE	Primary	52	1	0.4
B6	-2	88	No answer	TRUE	Primary	240	1	1.85
B6	1	88		TRUE	Primary	1092	1	8.41
B6	2	88		TRUE	Primary	3170	1	24.43
B6	3	88		TRUE	Primary	5054	1	38.95
B6	4	88		TRUE	Primary	2580	1	19.88
B6	5	88		TRUE	Primary	644	1	4.96
B6	6	88		TRUE	Primary	121	1	0.93
B6	>6	88		TRUE	Primary	24	1	0.18
B6_err	TRUE	89	B5 < B6 (fewer rooms than bedrooms)	FALSE	Derived	52	1	0.4
B6_err	FALSE	89	B5 >= B6	FALSE	Derived	12925	1	99.6
B7	-2	90	No answer	FALSE	Primary	262	1	2.02
B7	-1	90	Don't know	FALSE	Primary	75	1	0.58
B7	1	90	Yes	FALSE	Primary	11792	1	90.87
B7	2	90	No	FALSE	Primary	848	1	6.53
B8	-2	91	No answer	FALSE	Primary	263	1	2.03
B8	-1	91	Don't know	FALSE	Primary	211	1	1.63
B8	1	91	Yes	FALSE	Primary	3362	1	25.91
B8	2	91	No	FALSE	Primary	9141	1	70.44
B9	-2	92	No answer	FALSE	Primary	273	1	2.1
B9	-1	92	Don't know	FALSE	Primary	546	1	4.21
B9	1	92	Before 1900	FALSE	Primary	1436	1	11.07
B9	2	92	1900 to 1929	FALSE	Primary	1466	1	11.3
B9	3	92	1930 to 1949	FALSE	Primary	1778	1	13.7
B9	4	92	1950 to 1975	FALSE	Primary	3349	1	25.81
B9	5	92	1976 to 1990	FALSE	Primary	1787	1	13.77
B9	6	92	1991 to 2002	FALSE	Primary	1209	1	9.32
B9	7	92	2003 onwards	FALSE	Primary	1133	1	8.73
B1001	0	93	No	FALSE	Primary	2628	1	20.25
B1001	1	93	Yes	FALSE	Primary	10349	1	79.75
B1002	0	94	No	FALSE	Primary	10462	1	80.62
B1002	1	94	Yes	FALSE	Primary	2515	1	19.38
B1003	0	95	No	FALSE	Primary	8096	1	62.39
B1003	1	95	Yes	FALSE	Primary	4881	1	37.61
B1004	0	96	No	FALSE	Primary	6309	1	48.62
B1004	1	96	Yes	FALSE	Primary	6668	1	51.38
B1005	0	97	No	FALSE	Primary	5751	1	44.32
B1005	1	97	Yes	FALSE	Primary	7226	1	55.68
B1006	0	98	No	FALSE	Primary	651	1	5.02
B1006	1	98	Yes	FALSE	Primary	12326	1	94.98
B1007	0	99	No	FALSE	Primary	7958	1	61.32
B1007	1	99	Yes	FALSE	Primary	5019	1	38.68
B1008	0	100	No	FALSE	Primary	11303	1	87.1
B1008	1	100	Yes	FALSE	Primary	1674	1	12.9
B1009	0	101	No	FALSE	Primary	2150	1	16.57
B1009	1	101	Yes	FALSE	Primary	10827	1	83.43
B1010	0	102	No	FALSE	Primary	7058	1	54.39
B1010	1	102	Yes	FALSE	Primary	5919	1	45.61
B1011	0	103	No	FALSE	Primary	1513	1	11.66
B1011	1	103	Yes	FALSE	Primary	11464	1	88.34
B1012	0	104	No	FALSE	Primary	779	1	6
B1012	1	104	Yes	FALSE	Primary	12198	1	94
B1013	0	105	No	FALSE	Primary	12529	1	96.55
B1013	1	105	Yes	FALSE	Primary	448	1	3.45
B1014	0	106	No	FALSE	Primary	8981	1	69.21
B1014	1	106	Yes	FALSE	Primary	3996	1	30.79
B10_sum	0	107		FALSE	Derived	255	1	1.97
B10_sum	1-2	107		FALSE	Derived	22	1	0.17
B10_sum	3	107		FALSE	Derived	74	1	0.57
B10_sum	4	107		FALSE	Derived	288	1	2.22
B10_sum	5	107		FALSE	Derived	757	1	5.83
B10_sum	6	107		FALSE	Derived	1903	1	14.66
B10_sum	7	107		FALSE	Derived	2968	1	22.87
B10_sum	8	107		FALSE	Derived	3357	1	25.87
B10_sum	9	107		FALSE	Derived	2398	1	18.48
B10_sum	10	107		FALSE	Derived	836	1	6.44
B10_sum	11	107		FALSE	Derived	109	1	0.84
B10_sum	>11	107		FALSE	Derived	10	1	0.08
C1_new	-2	109		TRUE	Derived	326	1	2.51
C1_new	1	109		TRUE	Derived	3375	1	26.01
C1_new	2	109		TRUE	Derived	5409	1	41.68
C1_new	3	109		TRUE	Derived	1719	1	13.25
C1_new	4	109		TRUE	Derived	1521	1	11.72
C1_new	5	109		TRUE	Derived	448	1	3.45
C1_new	6	109		TRUE	Derived	130	1	1
C1_new	7	109		TRUE	Derived	32	1	0.25
C1_new	>7	109		TRUE	Derived	17	1	0.13
C2_Male_0_15	-2	110	No answer	TRUE	Primary	11237	1	86.59
C2_Male_0_15	0	110		TRUE	Primary	31	1	0.24
C2_Male_0_15	1	110		TRUE	Primary	1272	1	9.8
C2_Male_0_15	2	110		TRUE	Primary	386	1	2.97
C2_Male_0_15	>2	110		TRUE	Primary	51	1	0.39
C2_Male_16_24	-2	111	No answer	TRUE	Primary	11881	1	91.55
C2_Male_16_24	0	111		TRUE	Primary	25	1	0.19
C2_Male_16_24	1	111		TRUE	Primary	910	1	7.01
C2_Male_16_24	2	111		TRUE	Primary	140	1	1.08
C2_Male_16_24	>2	111		TRUE	Primary	21	1	0.16
C2_Male_25_44	-2	112	No answer	TRUE	Primary	9959	1	76.74
C2_Male_25_44	0	112		TRUE	Primary	21	1	0.16
C2_Male_25_44	1	112		TRUE	Primary	2779	1	21.41
C2_Male_25_44	2	112		TRUE	Primary	184	1	1.42
C2_Male_25_44	>2	112		TRUE	Primary	34	1	0.26
C2_Male_45_64	-2	113	No answer	TRUE	Primary	9342	1	71.99
C2_Male_45_64	0	113		TRUE	Primary	18	1	0.14
C2_Male_45_64	1	113		TRUE	Primary	3528	1	27.19
C2_Male_45_64	>1	113		TRUE	Primary	89	1	0.69
C2_Male_65_74	-2	114	No answer	TRUE	Primary	10646	1	82.04
C2_Male_65_74	0	114		TRUE	Primary	22	1	0.17
C2_Male_65_74	1	114		TRUE	Primary	2299	1	17.72
C2_Male_65_74	>1	114		TRUE	Primary	10	1	0.08
C2_Male_75_84	-2	115	No answer	TRUE	Primary	11788	1	90.84
C2_Male_75_84	0	115		TRUE	Primary	24	1	0.18
C2_Male_75_84	>0	115		TRUE	Primary	1165	1	8.98
C2_Male_85_plus	-2	116	No answer	TRUE	Primary	12617	1	97.23
C2_Male_85_plus	0	116		TRUE	Primary	25	1	0.19
C2_Male_85_plus	>0	116		TRUE	Primary	335	1	2.58
C2_Female_0_15	-2	117	No answer	TRUE	Primary	11326	1	87.28
C2_Female_0_15	0	117		TRUE	Primary	28	1	0.22
C2_Female_0_15	1	117		TRUE	Primary	1240	1	9.56
C2_Female_0_15	2	117		TRUE	Primary	341	1	2.63
C2_Female_0_15	>2	117		TRUE	Primary	42	1	0.32
C2_Female_16_24	-2	118	No answer	TRUE	Primary	11903	1	91.72
C2_Female_16_24	0	118		TRUE	Primary	25	1	0.19
C2_Female_16_24	1	118		TRUE	Primary	891	1	6.87
C2_Female_16_24	2	118		TRUE	Primary	134	1	1.03
C2_Female_16_24	>2	118		TRUE	Primary	24	1	0.18
C2_Female_25_44	-2	119	No answer	TRUE	Primary	9802	1	75.53
C2_Female_25_44	0	119		TRUE	Primary	22	1	0.17
C2_Female_25_44	1	119		TRUE	Primary	2989	1	23.03
C2_Female_25_44	2	119		TRUE	Primary	151	1	1.16
C2_Female_25_44	>2	119		TRUE	Primary	13	1	0.1
C2_Female_45_64	-2	120	No answer	TRUE	Primary	9058	1	69.8
C2_Female_45_64	0	120		TRUE	Primary	24	1	0.18
C2_Female_45_64	1	120		TRUE	Primary	3829	1	29.51
C2_Female_45_64	>1	120		TRUE	Primary	66	1	0.51
C2_Female_65_74	-2	121	No answer	TRUE	Primary	10671	1	82.23
C2_Female_65_74	0	121		TRUE	Primary	22	1	0.17
C2_Female_65_74	1	121		TRUE	Primary	2272	1	17.51
C2_Female_65_74	>1	121		TRUE	Primary	12	1	0.09
C2_Female_75_84	-2	122	No answer	TRUE	Primary	11807	1	90.98
C2_Female_75_84	0	122		TRUE	Primary	27	1	0.21
C2_Female_75_84	>0	122		TRUE	Primary	1143	1	8.81
C2_Female_85_plus	-2	123	No answer	TRUE	Primary	12662	1	97.57
C2_Female_85_plus	0	123		TRUE	Primary	27	1	0.21
C2_Female_85_plus	>0	123		TRUE	Primary	288	1	2.22
C2_sum	-2	124		FALSE	Derived	516	1	3.98
C2_sum	1	124		FALSE	Derived	3251	1	25.05
C2_sum	2	124		FALSE	Derived	5345	1	41.19
C2_sum	3	124		FALSE	Derived	1705	1	13.14
C2_sum	4	124		FALSE	Derived	1530	1	11.79
C2_sum	5	124		FALSE	Derived	442	1	3.41
C2_sum	6	124		FALSE	Derived	130	1	1
C2_sum	7	124		FALSE	Derived	33	1	0.25
C2_sum	8	124		FALSE	Derived	14	1	0.11
C2_sum	>8	124		FALSE	Derived	11	1	0.08
C2_error	TRUE	126	C2_sum_dif != 0 after obvious error correction	FALSE	Derived	216	1	1.66
C2_error	FALSE	126	C2_sum_diff == 0	FALSE	Derived	12761	1	98.34
C2_tot_child	-2	127		TRUE	Derived	649	1	5
C2_tot_child	0	127		TRUE	Derived	9825	1	75.71
C2_tot_child	1	127		TRUE	Derived	1177	1	9.07
C2_tot_child	2	127		TRUE	Derived	1057	1	8.15
C2_tot_child	3	127		TRUE	Derived	208	1	1.6
C2_tot_child	>3	127		TRUE	Derived	61	1	0.47
C2_tot_adult	-2	128		TRUE	Derived	649	1	5
C2_tot_adult	0	128		TRUE	Derived	83	1	0.64
C2_tot_adult	1	128		TRUE	Derived	3453	1	26.61
C2_tot_adult	2	128		TRUE	Derived	6771	1	52.18
C2_tot_adult	3	128		TRUE	Derived	1272	1	9.8
C2_tot_adult	4	128		TRUE	Derived	596	1	4.59
C2_tot_adult	5	128		TRUE	Derived	116	1	0.89
C2_tot_adult	>5	128		TRUE	Derived	37	1	0.29
C2_tot_65_plus	-2	129		TRUE	Derived	732	1	5.64
C2_tot_65_plus	0	129		TRUE	Derived	7121	1	54.87
C2_tot_65_plus	1	129		TRUE	Derived	2785	1	21.46
C2_tot_65_plus	2	129		TRUE	Derived	2321	1	17.89
C2_tot_65_plus	>2	129		TRUE	Derived	18	1	0.14
C2_all_65_plus	-2	130		TRUE	Derived	542	1	4.18
C2_all_65_plus	0	130	Not all aged 65+	TRUE	Derived	8598	1	66.26
C2_all_65_plus	1	130	All aged 65+	TRUE	Derived	3837	1	29.57
C301	-2	131	No answer	TRUE	Primary	6321	1	48.71
C301	0	131		TRUE	Primary	123	1	0.95
C301	1	131		TRUE	Primary	3491	1	26.9
C301	2	131		TRUE	Primary	2608	1	20.1
C301	3	131		TRUE	Primary	312	1	2.4
C301	4	131		TRUE	Primary	81	1	0.62
C301	>4	131		TRUE	Primary	41	1	0.32
C302	-2	132	No answer	TRUE	Primary	10467	1	80.66
C302	0	132		TRUE	Primary	183	1	1.41
C302	1	132		TRUE	Primary	2072	1	15.97
C302	2	132		TRUE	Primary	226	1	1.74
C302	3	132		TRUE	Primary	17	1	0.13
C302	>3	132		TRUE	Primary	12	1	0.09
C303	-2	133	No answer	TRUE	Primary	12082	1	93.1
C303	0	133		TRUE	Primary	185	1	1.43
C303	1	133		TRUE	Primary	658	1	5.07
C303	>1	133		TRUE	Primary	52	1	0.4
C304	-2	134	No answer	TRUE	Primary	12263	1	94.5
C304	0	134		TRUE	Primary	180	1	1.39
C304	1	134		TRUE	Primary	487	1	3.75
C304	>1	134		TRUE	Primary	47	1	0.36
C305	-2	135	No answer	TRUE	Primary	11357	1	87.52
C305	0	135		TRUE	Primary	159	1	1.23
C305	1	135		TRUE	Primary	904	1	6.97
C305	2	135		TRUE	Primary	433	1	3.34
C305	3	135		TRUE	Primary	86	1	0.66
C305	4	135		TRUE	Primary	20	1	0.15
C305	>4	135		TRUE	Primary	18	1	0.14
C306	-2	136	No answer	TRUE	Primary	7058	1	54.39
C306	0	136		TRUE	Primary	101	1	0.78
C306	1	136		TRUE	Primary	3260	1	25.12
C306	2	136		TRUE	Primary	2521	1	19.43
C306	>2	136		TRUE	Primary	37	1	0.29
C307	-2	137	No answer	TRUE	Primary	12566	1	96.83
C307	0	137		TRUE	Primary	116	1	0.89
C307	1	137		TRUE	Primary	243	1	1.87
C307	2	137		TRUE	Primary	42	1	0.32
C307	>2	137		TRUE	Primary	10	1	0.08
C3_sum	-2	138		FALSE	Derived	531	1	4.09
C3_sum	1	138		FALSE	Derived	3652	1	28.14
C3_sum	2	138		FALSE	Derived	6427	1	49.53
C3_sum	3	138		FALSE	Derived	1302	1	10.03
C3_sum	4	138		FALSE	Derived	733	1	5.65
C3_sum	5	138		FALSE	Derived	210	1	1.62
C3_sum	6	138		FALSE	Derived	57	1	0.44
C3_sum	7	138		FALSE	Derived	16	1	0.12
C3_sum	>7	138		FALSE	Derived	49	1	0.38
C3_error	TRUE	140	C3_sum_dif != 0 and C2_tot_adult calculatable, or C3_sum>15	FALSE	Derived	690	1	5.32
C3_error	FALSE	140	Otherwise	FALSE	Derived	12287	1	94.68
C3_edit	TRUE	141	C3_sum_diff == 0 and C3 and C2 both answered	FALSE	Derived	20	1	0.15
C3_edit	FALSE	141	Otherwise	FALSE	Derived	12957	1	99.85
None_working	0	142	Some adults working	FALSE	Derived	6833	1	52.65
None_working	1	142	No adults working	FALSE	Derived	5454	1	42.03
None_working		142	Not possible to determine	FALSE	Derived	690	1	5.32
C4	-2	143	No answer	TRUE	Primary	530	10	4.08
C4	-1	143	Don't know/prefer not to say	TRUE	Primary	650	10	5.01
C4	0	143		TRUE	Primary	4950	10	38.14
C4	1	143		TRUE	Primary	3730	10	28.74
C4	2	143		TRUE	Primary	2790	10	21.5
C4	3	143		TRUE	Primary	230	10	1.77
C4	4	143		TRUE	Primary	50	10	0.39
C4	>4	143		TRUE	Primary	10	10	0.08
C4		143	Non-numeric answer given	TRUE	Primary	0	10	0
C4_error	TRUE	144	C4 > C1_new and C1 answered (more qualified than occupants), or non-numeric answer given	FALSE	Derived	11	1	0.08
C4_error	FALSE	144	Otherwise	FALSE	Derived	12966	1	99.92
C5	-2	145	No answer	FALSE	Primary	364	1	2.8
C5	-1	145	Don't know	FALSE	Primary	16	1	0.12
C5	1	145	Yes	FALSE	Primary	460	1	3.54
C5	2	145	No	FALSE	Primary	12137	1	93.53
C6	-9	146	Not applicable	FALSE	Primary	12510	10	96.4
C6	-2	146	No answer	FALSE	Primary	0	10	0
C6	-1	146	Don't know	FALSE	Primary	0	10	0
C6	1	146	Mostly overnight (8pm to 7am)	FALSE	Primary	230	10	1.77
C6	2	146	Mostly during the day (7am to 4pm)	FALSE	Primary	30	10	0.23
C6	3	146	Mostly in the evening (4pm to 8pm)	FALSE	Primary	0	10	0
C6	4	146	Varies - whenever it's needed	FALSE	Primary	130	10	1
C6	5	146	Not applicable, charging is not done at home (e.g. at work)	FALSE	Primary	20	10	0.15
D1_new	-2	148	No answer	FALSE	Derived	465	1	3.58
D1_new	1	148	Under 18	FALSE	Derived	0	1	0
D1_new	2	148	18-24	FALSE	Derived	284	1	2.19
D1_new	3	148	25-44	FALSE	Derived	3060	1	23.58
D1_new	4	148	45-64	FALSE	Derived	4272	1	32.92
D1_new	5	148	65-74	FALSE	Derived	2904	1	22.38
D1_new	6	148	75-84	FALSE	Derived	1552	1	11.96
D1_new	7	148	85+	FALSE	Derived	440	1	3.39
D2_new	-3	150	Prefer not to say	FALSE	Derived	36	1	0.28
D2_new	-2	150	No answer	FALSE	Derived	522	1	4.02
D2_new	1	150	Male	FALSE	Derived	7021	1	54.1
D2_new	2	150	Female	FALSE	Derived	5383	1	41.48
D2_new	3	150	In some other way	FALSE	Derived	15	1	0.12
D3_new	-3	152	Prefer not to say	FALSE	Derived	52	1	0.4
D3_new	-2	152	No answer	FALSE	Derived	506	1	3.9
D3_new	1	152	Working (paid or unpaid): 30 hours a week or more	FALSE	Derived	4999	1	38.52
D3_new	2	152	Working (paid or unpaid): less than 30 hours a week	FALSE	Derived	1293	1	9.96
D3_new	3	152	Not working because of long-term sickness or disability	FALSE	Derived	408	1	3.14
D3_new	4	152	Unemployed but seeking work	FALSE	Derived	246	1	1.9
D3_new	5	152	A student	FALSE	Derived	161	1	1.24
D3_new	6	152	Retired/at home/not seeking work (including looking after the home or family)	FALSE	Derived	5162	1	39.78
D3_new	7	152	Other	FALSE	Derived	150	1	1.16
D4	-3	153	Prefer not to say	FALSE	Primary	233	1	1.8
D4	-2	153	No answer	FALSE	Primary	309	1	2.38
D4	-1	153	Don't know	FALSE	Primary	20	1	0.15
D4	1	153	Living comfortably	FALSE	Primary	4852	1	37.39
D4	2	153	Doing alright	FALSE	Primary	4963	1	38.24
D4	3	153	Just about getting by	FALSE	Primary	1989	1	15.33
D4	4	153	Finding it quite difficult	FALSE	Primary	416	1	3.21
D4	5	153	Finding it very difficult	FALSE	Primary	195	1	1.5
